# Supplementary material
Source: publisher figshare collection journal article supplement (https://acs.figshare.com/ndownloader/files/4355902)
Supplement: Supplementary file 1 [file 4355902]

# Phorbasones A and B, Sesterterpenoids Isolated from the Marine Sponge *Phorbas* sp. and Induction of Osteoblast Differentiation

Jung-Rae Rho,<sup>\*,†</sup> Buyng Su Hwang,<sup>†</sup> Seewon Joung,<sup>§</sup> Mi Ran Byun,<sup>‡</sup> Jeong-Ho Hong,<sup>‡</sup> and Hee-Yoon Lee<sup>\*,§</sup>

<sup>†</sup>Department of Oceanography, Kunsan National University, Jeonbuk, 573-701, Korea,

<sup>‡</sup>School of Life Sciences and Biotechnology, Korea University, Seoul, 136-701, Korea,

<sup>§</sup>Department of Chemistry, Korea Advanced Institute of Science and Technology(KAIST), Daejeon, 305-701, Korea

[jrrho@kunsan.ac.kr](mailto:jrrho@kunsan.ac.kr); [leehy@kaist.ac.kr](mailto:leehy@kaist.ac.kr)

## Contents

|                                                                                            |    |
|--------------------------------------------------------------------------------------------|----|
| General Experimental Method                                                                | 2  |
| Table S1. The spectral data for Phorbasone B(2) in CD <sub>3</sub> OD                      | 6  |
| Table S2. The spectral data for Cyclized Phorbasone A(3) in CD <sub>3</sub> OD             | 7  |
| Figure S1. CD spectrum of Phorbasone A(1) recorded in MeOH                                 | 8  |
| Figure S2. <sup>1</sup> H NMR spectrum of Phorbasone A(1) in CD <sub>3</sub> OD            | 9  |
| Figure S3. <sup>13</sup> C NMR spectrum of Phorbasone A(1) in CD <sub>3</sub> OD           | 10 |
| Figure S4. COSY NMR spectrum of Phorbasone A(1) in CD <sub>3</sub> OD                      | 11 |
| Figure S5. TOCSY NMR spectrum of Phorbasone A(1) in CD <sub>3</sub> OD                     | 12 |
| Figure S6. HSQC NMR spectrum of Phorbasone A(1) in CD <sub>3</sub> OD                      | 13 |
| Figure S7. HMBC NMR spectrum of Phorbasone A(1) in CD <sub>3</sub> OD                      | 14 |
| Figure S8. Selective HMBC NMR spectrum of Phorbasone A(1) in CD <sub>3</sub> OD            | 15 |
| Figure S9. NOESY NMR spectrum of Phorbasone A(1) in CD <sub>3</sub> OD                     | 16 |
| Figure S10. NOESY1D NMR spectrum of Phorbasone A(1) in CD <sub>3</sub> OD                  | 17 |
| Figure S11. <sup>1</sup> H NMR spectrum of Phorbasone B(2) in CD <sub>3</sub> OD           | 18 |
| Figure S12. Expanded <sup>1</sup> H NMR spectrum of Phorbasone B(2) in CD <sub>3</sub> OD  | 19 |
| Figure S13. <sup>13</sup> C NMR spectrum of Phorbasone B(2) in CD <sub>3</sub> OD          | 20 |
| Figure S14. COSY NMR spectrum of Phorbasone B(2) in CD <sub>3</sub> OD                     | 21 |
| Figure S15. TOCSY NMR spectrum of Phorbasone B(2) in CD <sub>3</sub> OD                    | 22 |
| Figure S16. HSQC NMR spectrum of Phorbasone B(2) in CD <sub>3</sub> OD                     | 23 |
| Figure S17. HMBC NMR spectrum of Phorbasone B(2) in CD <sub>3</sub> OD                     | 24 |
| Figure S18. NOESY NMR spectrum of Phorbasone B(2) in CD <sub>3</sub> OD                    | 25 |
| Figure S19. Expanded NOESY NMR spectrum of Phorbasone B(2) in CD <sub>3</sub> OD           | 26 |
| Figure S20. <sup>1</sup> H NMR spectrum of cyclized phobasone A (3) in CD <sub>3</sub> OD  | 27 |
| Figure S21. <sup>13</sup> C NMR spectrum of cyclized phobasone A (3) in CD <sub>3</sub> OD | 28 |
| Figure S22. COSY NMR NMR spectrum of cyclized phobasone A (3) in CD <sub>3</sub> OD        | 29 |
| Figure S23. HSQC NMR spectrum of cyclized phobasone A (3) in CD <sub>3</sub> OD            | 30 |
| Figure S24. HMBC NMR spectrum of cyclized phobasone A (3) in CD <sub>3</sub> OD            | 31 |
| Figure S25. NOESY NMR spectrum of cyclized phobasone A (3) in CD <sub>3</sub> OD           | 32 |
| Figure S26. Expanded NOESY NMR spectrum of cyclized phobasone A (3) in CD <sub>3</sub> OD  | 33 |

## General Experimental Method

### *General Instruments*

Optical rotations were measured on a JASCO P-1010 polarimeter with a 5 cm cell. UV spectra were obtained in MeOH using a Varian Cary 50 and IR spectra were measured on a JASCO FT/IR 4100 spectrometer. NMR spectra of compounds **1** and **2** were recorded on a Varian VNMRS 500 spectrometer in CD<sub>3</sub>OD solutions, and those of compound **3** on a Bruker AVANCE 400 spectrometer in CD<sub>3</sub>OD solutions. The measured concentrations of phorbasone A and B were 3 mg / 300  $\mu$ l and 2 mg / 300  $\mu$ l, respectively. Chemical shifts of the proton and carbon spectra measured in CD<sub>3</sub>OD solution were reported in reference to residual solvent peaks at 3.30 ppm and 49.0 ppm, respectively. HPLC was carried out on a Varian ProStar 230 solvent delivery system with ProStar 355 Refractive Index detector. High resolution mass spectra were obtained on a JEOL JMS-700 spectrometer at Korea Basic Science Research Institute, Daegu, Korea.

### *Animal Material*

The specimen of *Phorbas* sp. (Sample No. 08G-11) were collected by hand using SCUBA at Gageo Island at 25m depth in July 2008, Southwest Sea, Korea. The sponge is massive, measure 30  $\times$  20 mm and 15 mm thick. The surface has many oscular bearing papillae. Oscules are rare. The texture is soft. The colour in life is red and gradually changing to dark brown in alcohol. In skeleton, megascleres are tornotes (315-440  $\times$  4-8  $\mu$ m), acanthostyles (227-460  $\times$  8-15  $\mu$ m), and microscleres are isochelaes (37.5-50  $\mu$ m). A voucher specimen (registry No. Spo. 50) is deposited at the Natural History Museum, Hannam University, Korea.

### *Extraction and Isolation*

The collected specimen was frozen on site and delivered to the laboratory under dry ice, and then kept in a refrigerator at -25  $^{\circ}$ C until study. Freshly thawed sponge was cut into small pieces and extracted twice with MeOH at room temperature. The methanolic extract was partitioned between

CH<sub>2</sub>Cl<sub>2</sub> and H<sub>2</sub>O solvents. The organic layer was evaporated under reduced pressure and repartitioned between *n*-hexane and 15% aqueous MeOH for defatting. Then the aqueous MeOH fraction (*ca* 5 g) was subjected to reversed phase silica gel flash column chromatography eluting with solvents of decreasing polarity (MeOH / H<sub>2</sub>O = 50 / 50; 60 / 40; 70 / 30; 80 / 20; 90 / 10; 100% MeOH; 100% acetone) to give seven fractions. The fraction eluted with MeOH / H<sub>2</sub>O (90 / 10) solvent consisted in large part of phorbaketal A compound reported by our group and showed conspicuous effect on calcium deposition in mesenchymal C3H10T1/2 cells. This fraction (~1.4 g) was separated by reversed phase preparative HPLC [C18, YMC ODS-H80; column, 150 mm × 20 mm ID) eluting with AcCN / H<sub>2</sub>O (65 / 35) with a flow rate of 5.5 ml / min] to give the major compound, phorbaketal A (1.0 g) and a minor compound, phorbasone A (**1**, 22 mg) at a retention time of 43 min. Additionally, phorbasone B (**2**, 5.0 mg) was isolated from the MeOH / H<sub>2</sub>O (80 / 20) solvent fraction by reversed phase semi-preparative HPLC [C18, YMC ODS-A; column, 250 mm × 10 mm ID) eluting with MeOH / H<sub>2</sub>O (70 / 30) with a flow rate of 2.0 ml / min].

Phorbasone A (**1**): yellowish oil,  $[\alpha]_D^{25}$  -107.2 (*c* 0.15 MeOH); IR (film)  $\nu_{\max}$  3433, 2926, 1672, 1448 cm<sup>-1</sup>; UV (MeOH)  $\lambda_{\max}$  225 nm (log  $\epsilon$  4.05), 261 (log  $\epsilon$  3.69), 273 (log  $\epsilon$  3.61), 285 (log  $\epsilon$  3.10);; HRFABMS *m/z* 405.2410 [M + Na]<sup>+</sup> (calcd for C<sub>25</sub>H<sub>34</sub>O<sub>3</sub>Na, 405.2406); <sup>1</sup>H and <sup>13</sup>C NMR data is given in Table 1.

Phorbasone B (**2**): colorless oil,  $[\alpha]_D^{25}$  -47.1 (*c* 0.10 MeOH); IR (film)  $\nu_{\max}$  3409, 2928, 1664, 1447 cm<sup>-1</sup>; UV (MeOH)  $\lambda_{\max}$  230 nm (log  $\epsilon$  3.90), 257 (log  $\epsilon$  3.76), 268 (log  $\epsilon$  3.75), 280 (log  $\epsilon$  3.62); HRFABMS *m/z* 439.2460 [M + Na]<sup>+</sup> (calcd for C<sub>25</sub>H<sub>36</sub>O<sub>5</sub>Na, 439.2460); <sup>1</sup>H and <sup>13</sup>C NMR data is given in Table S1.

### ***MTPA reaction of Phorbasone A(1)***

To a stirred solution of phorbasone A (**1**, 3 mg) and dried pyridine (20  $\mu$ l) in dry CH<sub>2</sub>Cl<sub>2</sub> (0.5 ml) at room temperature, *R*-MTPA-Cl (150  $\mu$ l) was added. The reaction progress was monitored by TLC chromatography on silica gel (Hex : EtOAc = 4 : 1). After ~ 10 hrs, the reaction mixture was quenched by the addition of H<sub>2</sub>O and dimethyl ether. The organic layer was concentrated in *vacuo*.

The mixture was subjected on silica-phased HPLC using hexane / ethyl acetate (5 : 1) to give the *S*-MTPA-ester **1S**.  $^1\text{H}$  NMR (500MHz,  $\text{CDCl}_3$ )  $\delta$  6.84 (dd,  $J = 5.9, 1.5$  Hz, H-14), 6.76 (d,  $J = 2.0$  Hz, H-6), 5.39 (dd,  $J = 5.9, 2.5$  Hz, H-13), 5.09 (s, H-24), 5.02 (s, H-18), 4.81 (s, H-18), 4.79 (s, H-24), 3.60 (brd,  $J = 12.0$  Hz, H-12), 2.71 (dd,  $J = 16.6, 12.0$  Hz, H-17), 2.65 (dd,  $J = 16.6, 4.9$  Hz, H-17), 2.58 (s, H-9), 2.56 (d,  $J = 2.0$  Hz, H-5), 1.87 (s,  $\text{H}_3$ -22), 1.83 (d,  $J = 1.5$  Hz,  $\text{H}_3$ -25). In an entirely analogous way, the *R*-MTPA-ester **1R** was obtained using *S*-MTPA-Cl.:  $^1\text{H}$  NMR (500MHz,  $\text{CDCl}_3$ )  $\delta$  6.78 (dd,  $J = 5.9, 1.5$  Hz, H-14), 6.79 (d,  $J = 2.0$  Hz, H-6), 5.47 (dd,  $J = 5.9, 2.7$  Hz, H-13), 5.17 (s, H-18), 5.10 (s, H-24), 4.98 (s, H-18), 4.82 (s, H-24), 3.61 (brd,  $J = 12.5$  Hz, H-12), 2.73 (dd,  $J = 16.6, 12.5$  Hz, H-17), 2.66 (dd,  $J = 16.6, 4.4$  Hz, H-17), 2.59 (s, H-9), 2.56 (d,  $J = 2.0$  Hz, H-5), 1.87 (s,  $\text{H}_3$ -22), 1.79 (d,  $J = 1.5$  Hz,  $\text{H}_3$ -25).

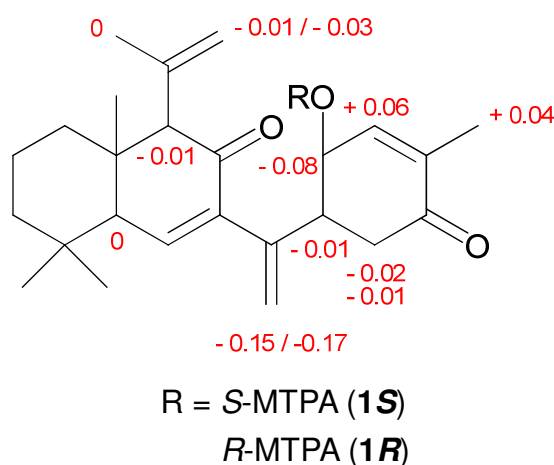

$^1\text{H}$  NMR chemical shifts differences ( $\Delta\delta^{\text{S-R}}$ ) in ppm for *S*/*R*-MTPA esters of **1**.

### ***Synthesis of 3: Acetal formation of Phorbasone A(1)***

A solution of HCl in anhydrous MeOH (6.5  $\mu\text{l}$ , 0.1 M) was added to a stirred solution of phorbasone A (5 mg) in anhydrous MeOH (1 ml) at room temperature. The resulting reaction mixture was stirred for 24 hours at room temperature. The reaction was quenched with saturated aqueous solution of  $\text{NaHCO}_3$  (3 ml). The crude product was extracted with ethyl acetate (5 ml x 3). The combined organic layer was dried over sodium sulfate, filtered, and concentrated in *vacuo*. The crude product mixture was purified by silica gel column chromatography with hexane / ethyl acetate (10 / 1) to afford the cyclized phorbasone A (**3**, 2.5mg, 48%).

### ***Cell culture and osteoblast differentiation***

C3H10T1/2 cells were maintained in Dulbecco's modified Eagle's medium (DMEM) supplemented with 10% fetal bovine serum (Hyclone) and antibiotics (100 units/ml penicillin, 100ug/ml streptomycin). To induce osteoblast differentiation, C3H10T1/2 cells were seeded on 24 well culture plates at a density of  $2 \times 10^4$  cells/cm<sup>2</sup> and 48hr later the culture media were changed with DMEM containing 50  $\mu$ M ascorbic acid, 10 mM  $\beta$ -glycerophosphate and 10% FBS (Differentiation media) for 6 days. The media (Differentiation media) was replaced every 2 days.

### ***Calcium deposition activity***

Calcium deposition activity was analyzed by Alizarin Red S staining. Briefly, cell layers were washed twice with cold PBS, fixed with 70 % ethanol at  $-20^{\circ}\text{C}$  for 1 h and then rinsed once with cold PBS before staining with a 40 mM Alizarin Red S (Sigma) solution in water for 20 min. Staining was followed by three washes with distilled water and one with 70% ethanol.

**Table S1. The spectral data for Phorbasone B (2).**

| No  | $\delta_C$             | $\delta_H$ , multi ( <i>J</i> Hz) |
|-----|------------------------|-----------------------------------|
| 1a  | 37.6, CH <sub>2</sub>  | 1.37, br d (13.2)                 |
| 1b  |                        | 1.41, ddd (13.2, 13.2, 3.4)       |
| 2a  | 19.4, CH <sub>2</sub>  | 1.53, br d (13.2)                 |
| 2b  |                        | 1.78, m                           |
| 3a  | 42.3, CH <sub>2</sub>  | 1.27, m                           |
| 3b  |                        | 1.54, m                           |
| 4   | 33.7, C                |                                   |
| 5   | 49.3, CH               | 2.59, d (2.0)                     |
| 6   | 152.2, CH              | 7.31, d (2.0)                     |
| 7   | 139.8, C               |                                   |
| 8   | 202.0, C               |                                   |
| 9   | 71.2, CH               | 2.52, s                           |
| 10  | 43.0, C                |                                   |
| 11  | 79.6, C                |                                   |
| 12  | 42.2, CH               | 2.85, dd (13.7, 2.7)              |
| 13  | 65.3, CH               | 4.66, dd (5.9, 1.7)               |
| 14  | 144.2, CH              | 6.76, dq (5.9, 1.2)               |
| 15  | 137.5, C               |                                   |
| 16  | 202.5, C               |                                   |
| 17a | 35.3, CH <sub>2</sub>  | 2.06, dd (13.7, 2.7)              |
| 17b |                        | 2.81, dd (13.7, 13.7)             |
| 18a | 67.2, CH <sub>2</sub>  | 3.96, d (10.7)                    |
| 18b |                        | 4.00, d (10.7)                    |
| 19  | 33.3, CH <sub>3</sub>  | 1.09, s                           |
| 20  | 23.5, CH <sub>3</sub>  | 1.02, s                           |
| 21  | 23.4, CH <sub>3</sub>  | 1.12, s                           |
| 22  | 27.6, CH <sub>3</sub>  | 1.83, s                           |
| 23  | 141.7, C               |                                   |
| 24a | 115.3, CH <sub>2</sub> | 4.94, s                           |
| 24b |                        | 5.01, br s                        |
| 25  | 15.5, CH <sub>3</sub>  | 1.75, d (1.2)                     |

All assignments were performed using <sup>1</sup>H, <sup>13</sup>C, COSY, HSQC, HMBC and NOESY on a Varian VNMRS 500 spectrometer (500MHz for <sup>1</sup>H) in CD<sub>3</sub>OD solutions

**Table S2. The spectral data for cyclized phorbasonone A (3).**

| No  | $\delta_C$             | $\delta_H$ , mult ( <i>J</i> Hz) | HMBC correlations            | NOE's             |
|-----|------------------------|----------------------------------|------------------------------|-------------------|
| 1   | 39.7, CH <sub>2</sub>  | 1.32, m                          | C-3, 5, 10, 21               | H-5, 9, 21, 22    |
| 2a  | 19.7, CH <sub>2</sub>  | 1.41, m                          | C-1, 5                       |                   |
| 2b  |                        | 1.58, m                          |                              | H-20, 21          |
| 3a  | 45.4, CH <sub>2</sub>  | 1.19, m                          | C-1, 4                       |                   |
| 3b  |                        | 1.39, m                          |                              | H-19              |
| 4   | 34.5, C                |                                  |                              |                   |
| 5   | 41.8, CH               | 1.93, d (10.2)                   | C-4, 6, 9, 10, 20, 21        | H-1, 3a, 24a, OMe |
| 6   | 75.8, CH               | 4.64, d (10.2)                   | C-4, 5, 7, 8, 11, OMe        | H-18b, 20, 21     |
| 7   | 109.5, C               |                                  |                              |                   |
| 8   | 156.9, C               |                                  |                              |                   |
| 9   | 61.9, CH               | 2.34, s                          | C-4,7, 8, 10, 21, 22, 23, 24 | H-1, 21, 22, 24a  |
| 10  | 39.1, C                |                                  |                              |                   |
| 11  | 138.0, C               |                                  |                              |                   |
| 12  | 40.3, CH               | 3.19, m                          | C-14                         | H-13, 17a, 18a    |
| 13  | 73.5, CH               | 4.98, m                          | C-8, -11, 14, -15            | H-12, 17a         |
| 14  | 145.8, CH              | 6.52, m                          | C-16                         | H-13, 24a         |
| 15  | 139.5, C               |                                  |                              |                   |
| 16  | 199.4, C               |                                  |                              |                   |
| 17a | 41.0, CH <sub>2</sub>  | 2.63, dd (16.6, 3.8)             | C-12, 13, 15, 16             | H-12, 13, 17b     |
| 17b |                        | 2.96, dd (16.6, 5.2)             |                              | H-17a, 18a        |
| 18a | 108.8, CH <sub>2</sub> | 4.86, d (2.0)                    | C-7, 11, 12                  | H-12, 17b, 18b    |
| 18b |                        | 5.53, d (2.0)                    |                              | H-6, 18a          |
| 19  | 35.3, CH <sub>3</sub>  | 1.11, s                          | C-3, 4, 5, 20                | H-3b, 5, OMe      |
| 20  | 23.1, CH <sub>3</sub>  | 1.07, s                          | C-3, 4, 5, 19                | H-2b, 6           |
| 21  | 23.8, CH <sub>3</sub>  | 1.01, s                          | C-1, 5, 9, 10                | H-1, 2b, 6, 9     |
| 22  | 27.0, CH <sub>3</sub>  | 1.88, s                          | C-9, 23, 24                  | H-1, 9, 24b       |
| 23  | 146.3, C               |                                  |                              |                   |
| 24a | 115.7, CH <sub>2</sub> | 4.91, s                          | C-9, 22                      | H-5, 9, 14, OMe   |
| 24b |                        | 5.13, br s                       |                              | H-22, 24a         |
| 25  | 15.7, CH <sub>3</sub>  | 1.67, d (1.7)                    | C-14, 15, 16                 | H-OMe             |
| OMe | 48.6, CH <sub>3</sub>  | 2.84, s                          | C-6                          | H-5, 19, 24a, 25  |

All assignments were performed using <sup>1</sup>H, <sup>13</sup>C, COSY, HSQC, HMBC and NOESY on a Bruker AVANCE 400 spectrometer (400MHz for <sup>1</sup>H) in CD<sub>3</sub>OD solutions

**Figure S1. CD spectrum of phorbasone A (1) recorded in MeOH.**

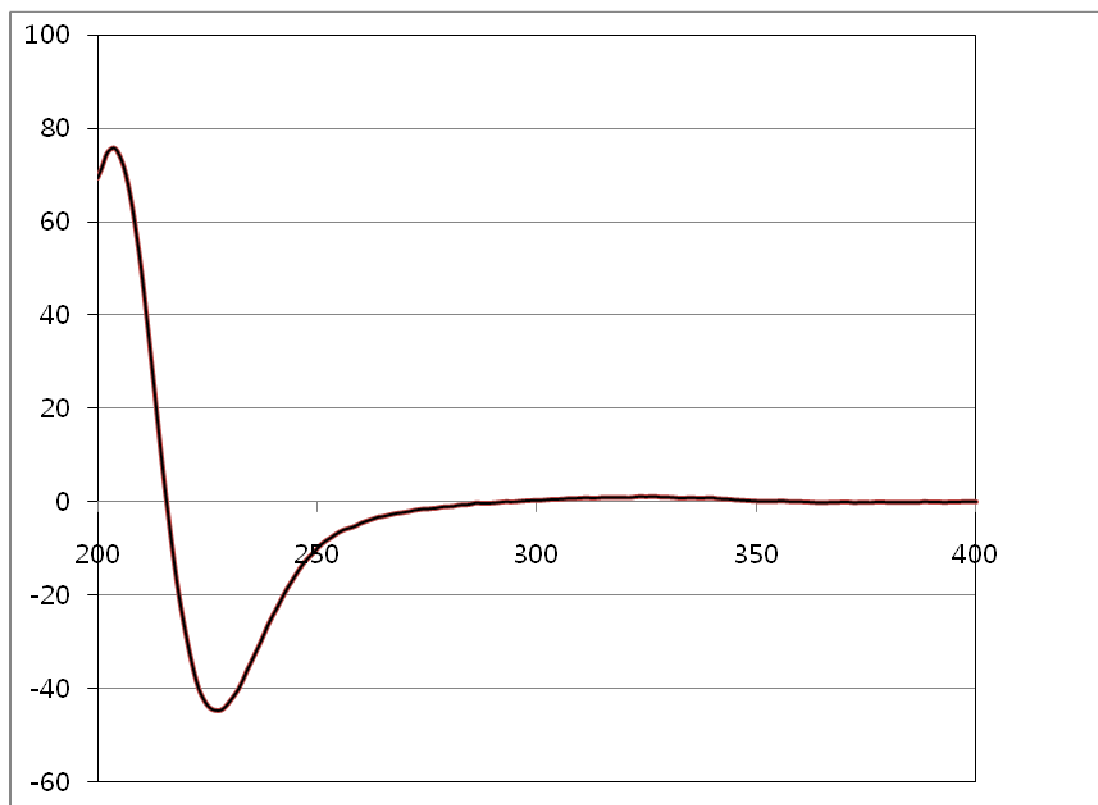

SPECTROMETER/DATA SYSTEM

ORIGIN JASCO-815

LOCALE 1042

RESOLUTION

DELTA X -1

XUNITS NANOMETERS

YUNITS ARBITRARY UNITS

FIRST X 400

LAST X 200

NPOINTS 201

FIRST Y 0.07732

MAX Y 75.59769

MIN Y -44.531

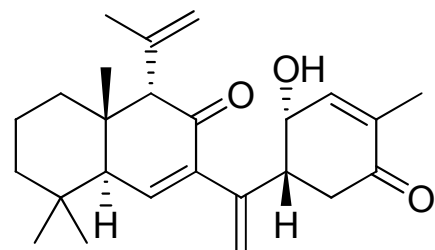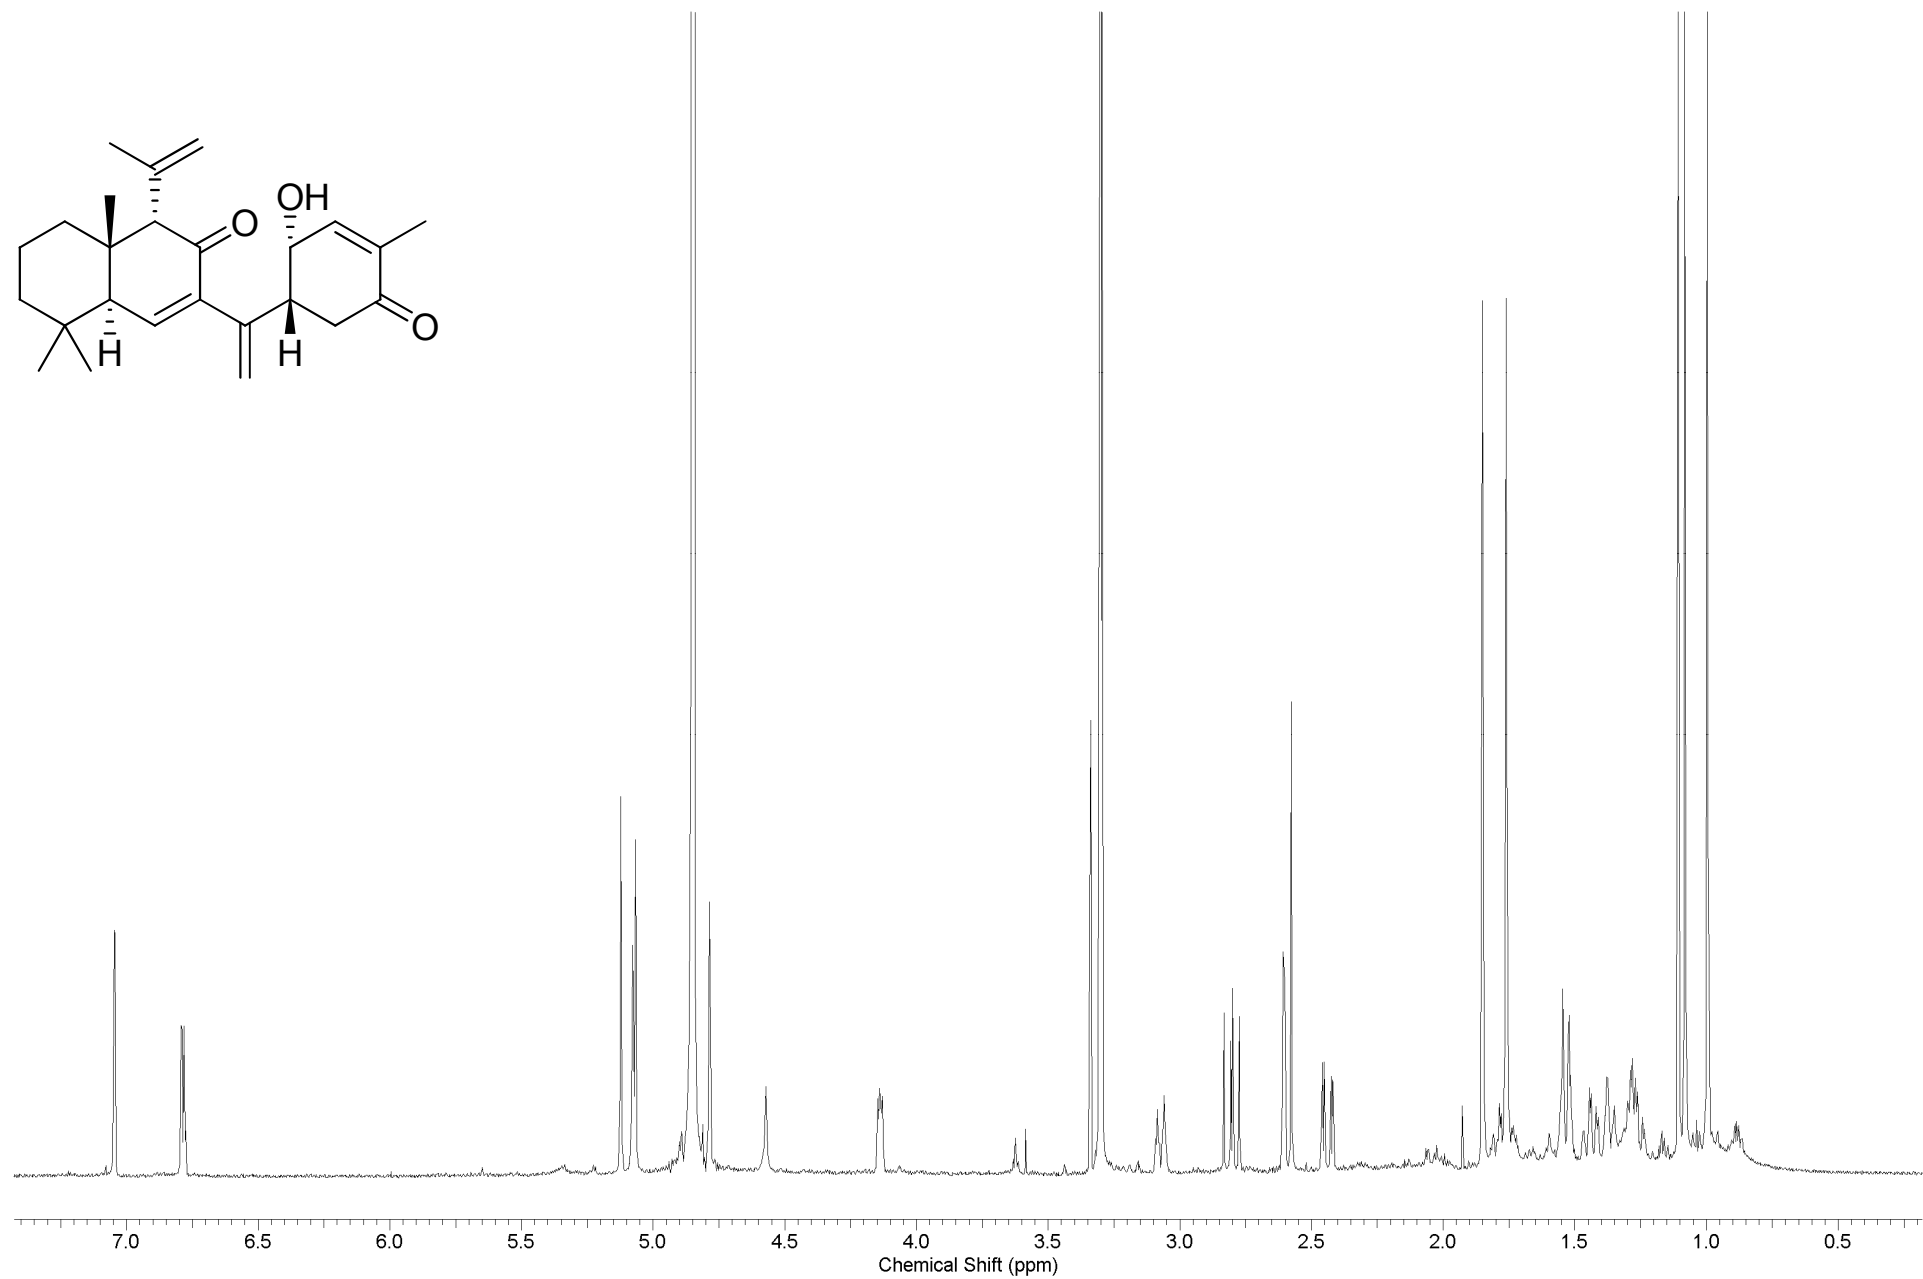

**Figure S2.  $^1\text{H}$  NMR spectrum of phorbasone A (1) in  $\text{CD}_3\text{OD}$ .**

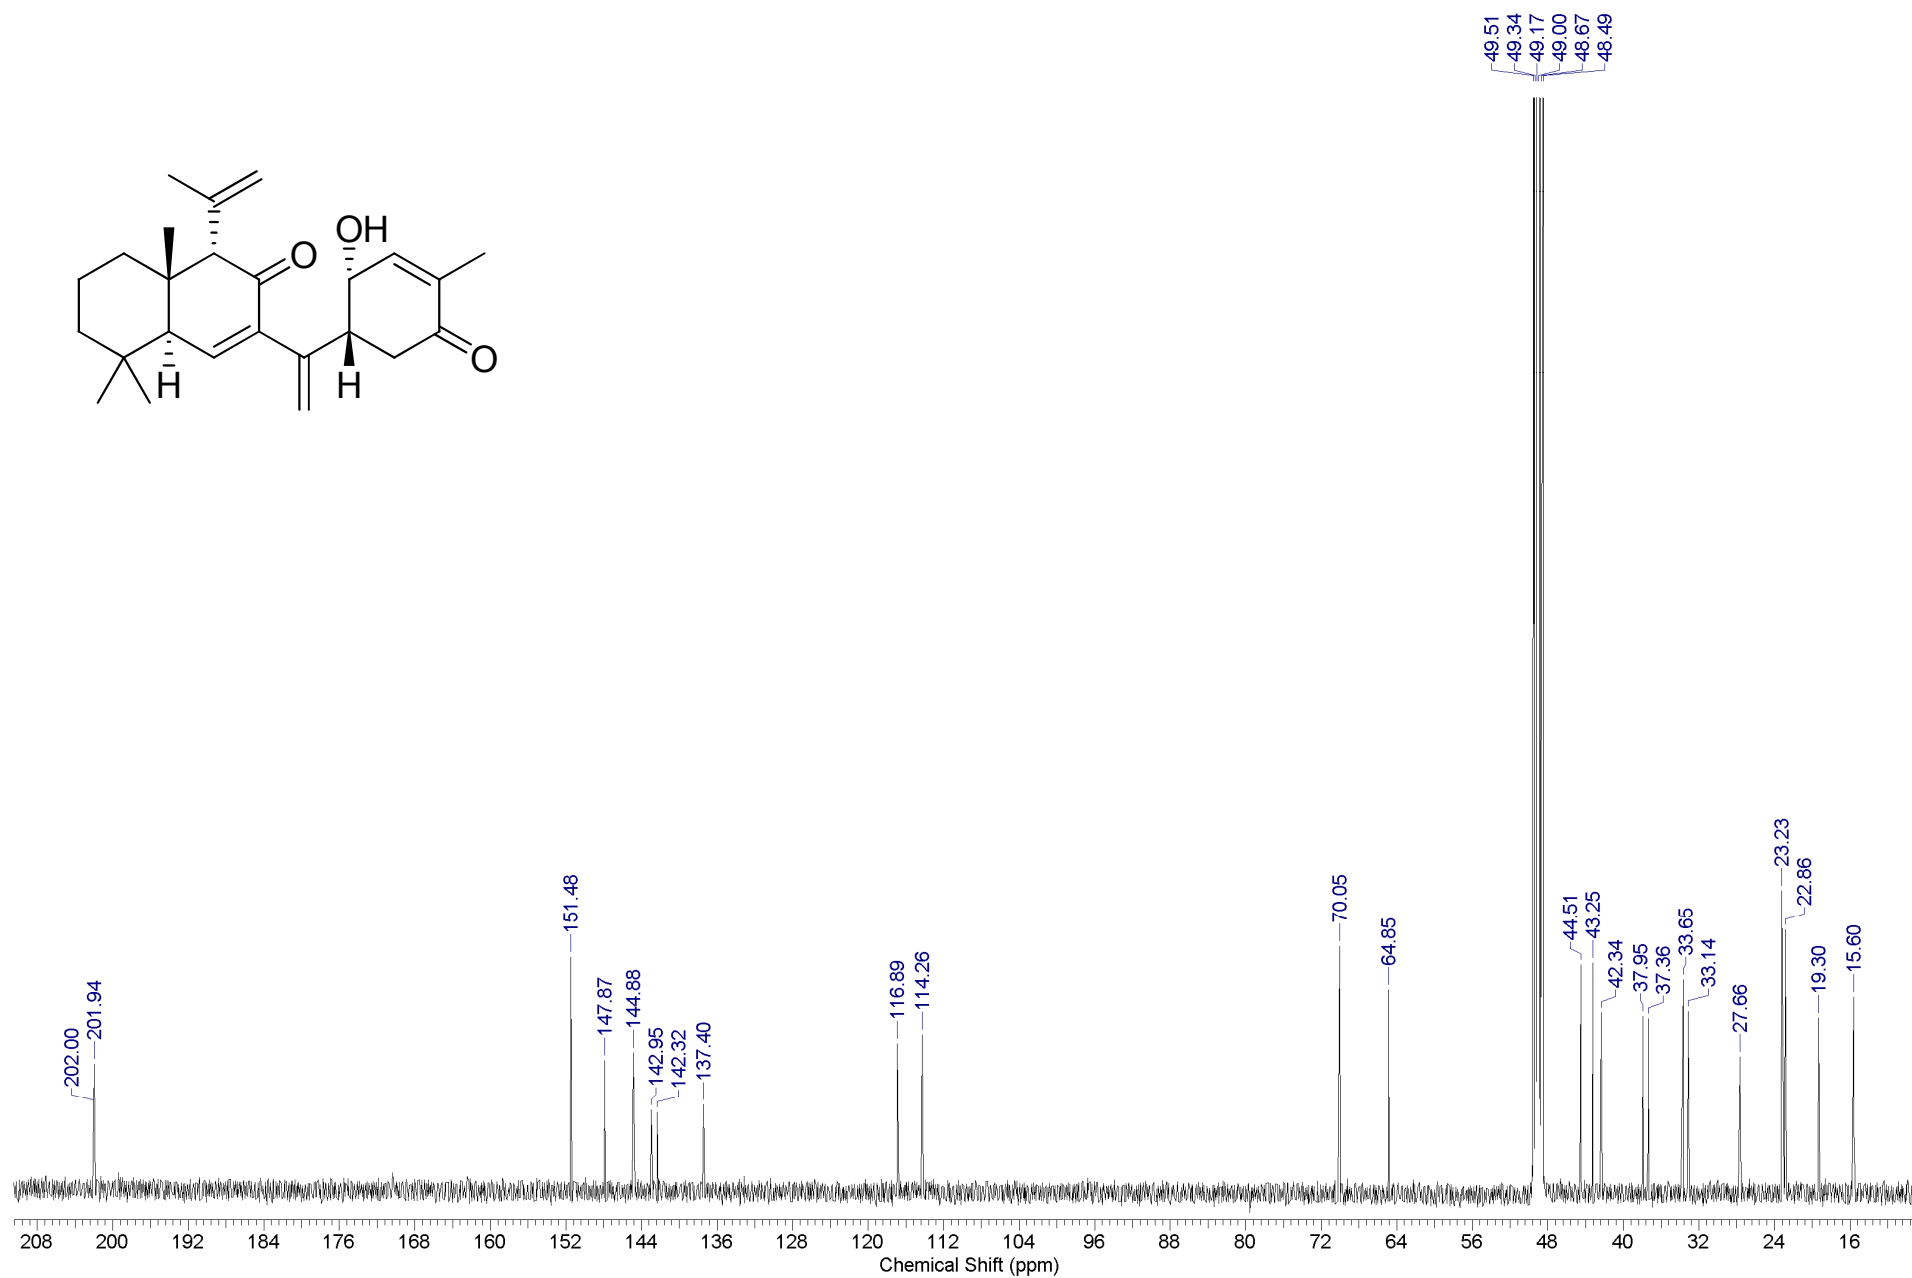

Figure S3.  $^{13}\text{C}$  NMR spectrum of phorbasone A (1) in  $\text{CD}_3\text{OD}$ .

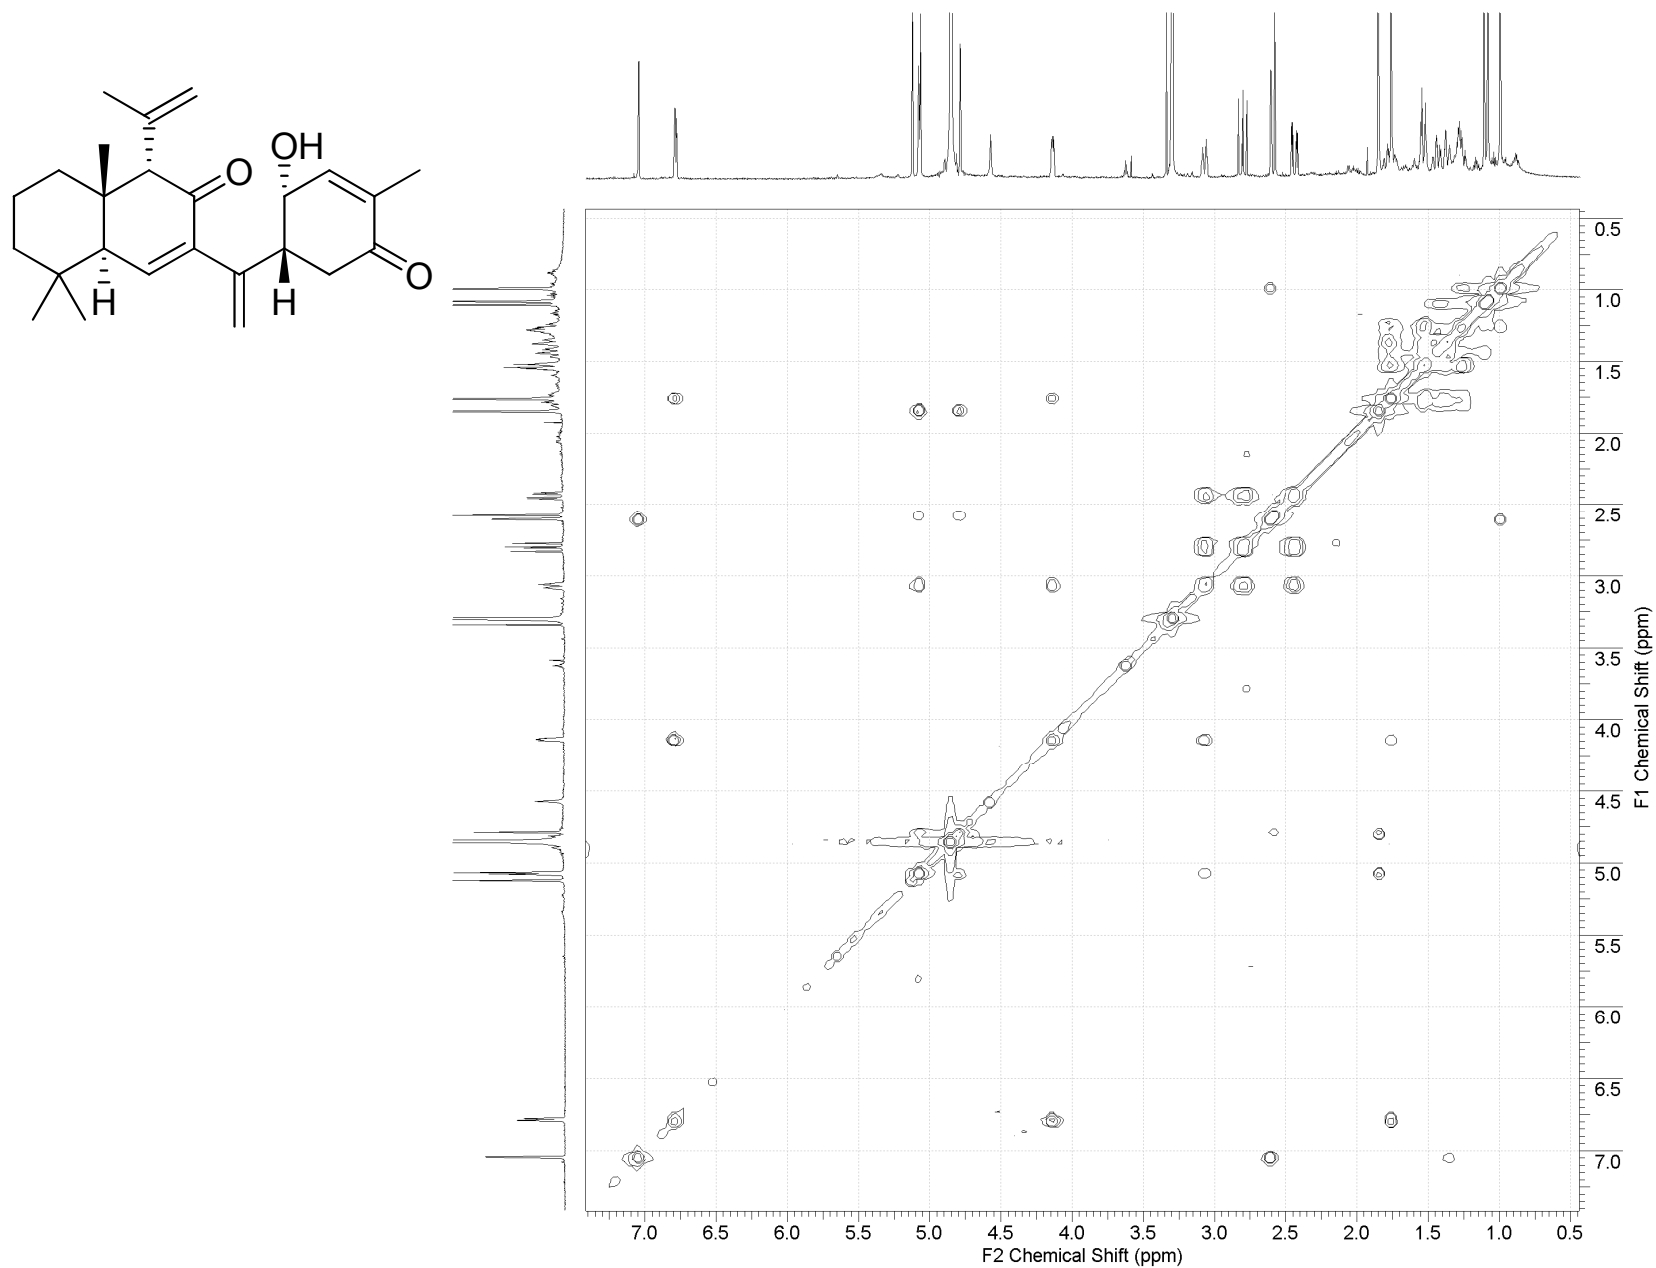

**Figure S4. COSY NMR spectrum of phorbasone A (1) in CD<sub>3</sub>OD.**

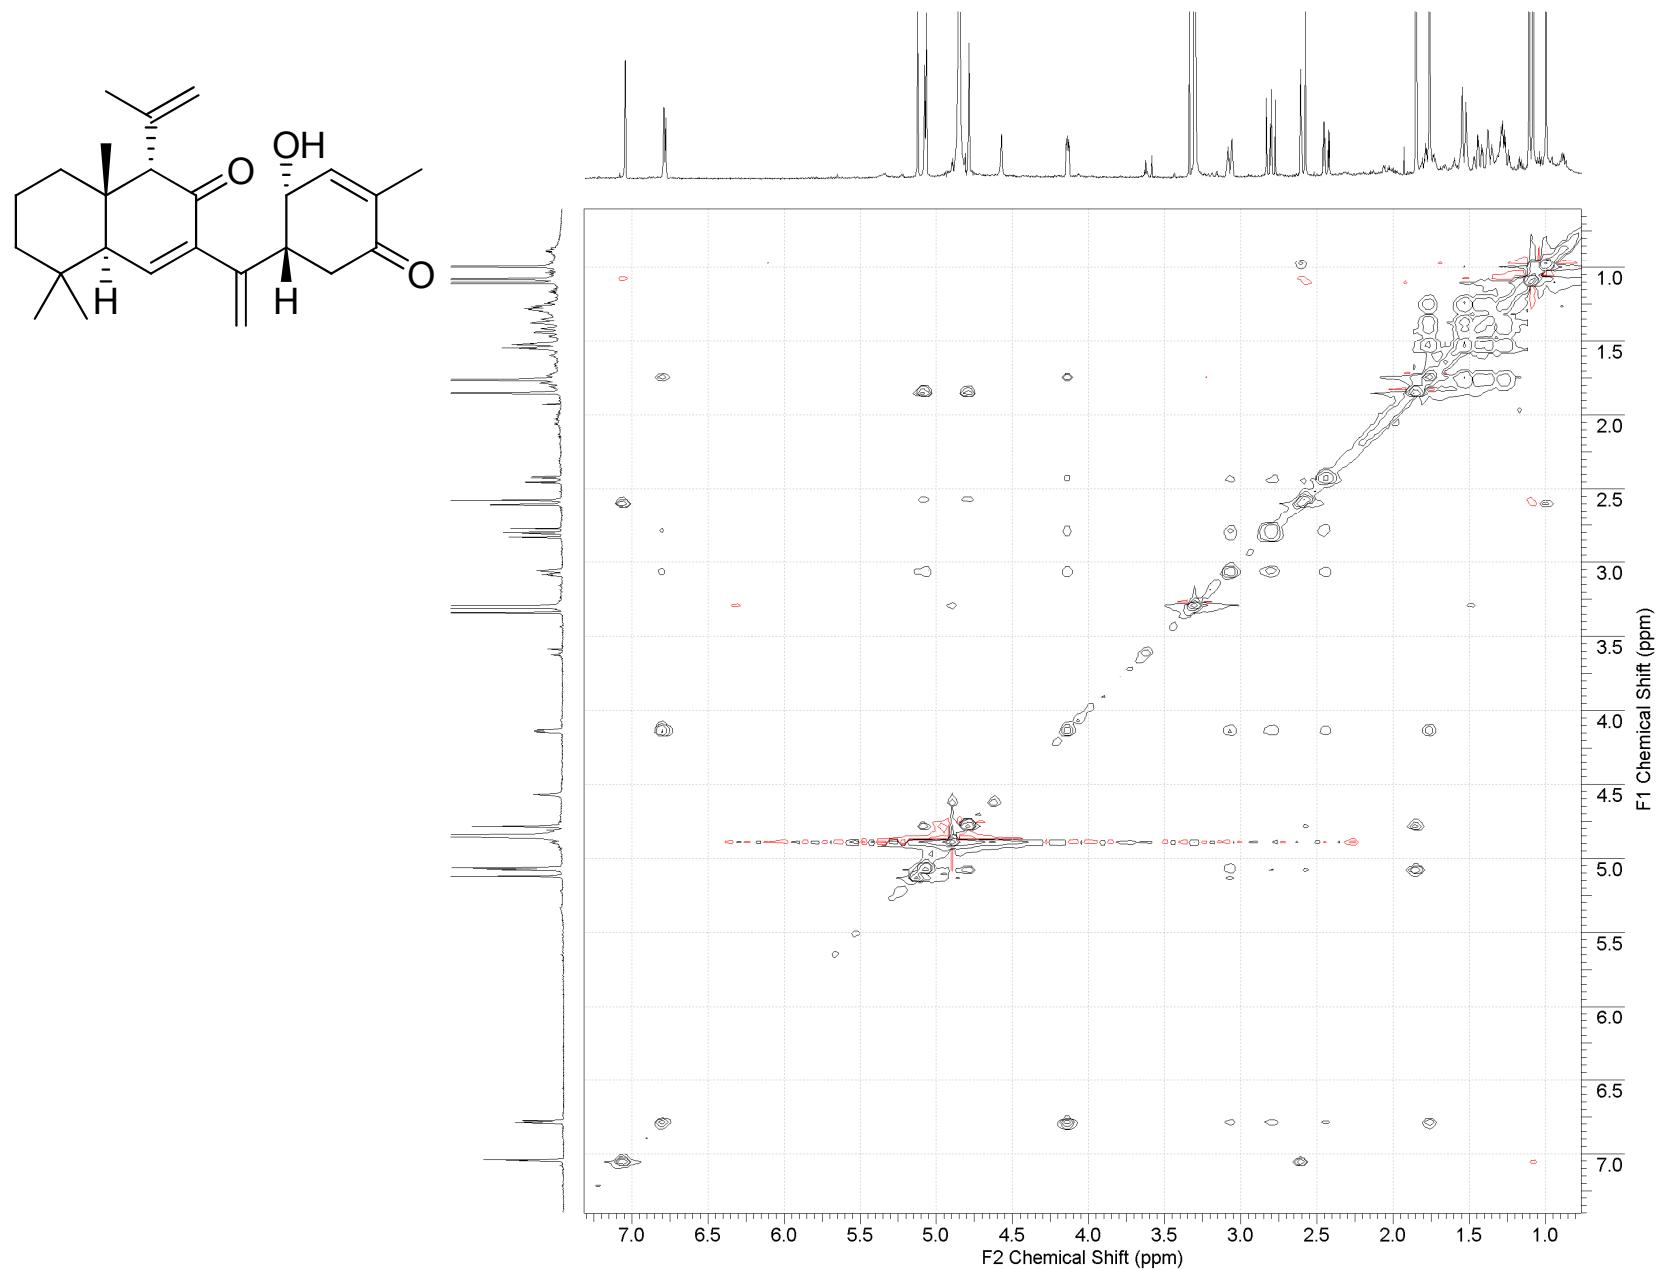

**Figure S5. TOCSY NMR spectrum of phorbasone A (1) in CD<sub>3</sub>OD.**

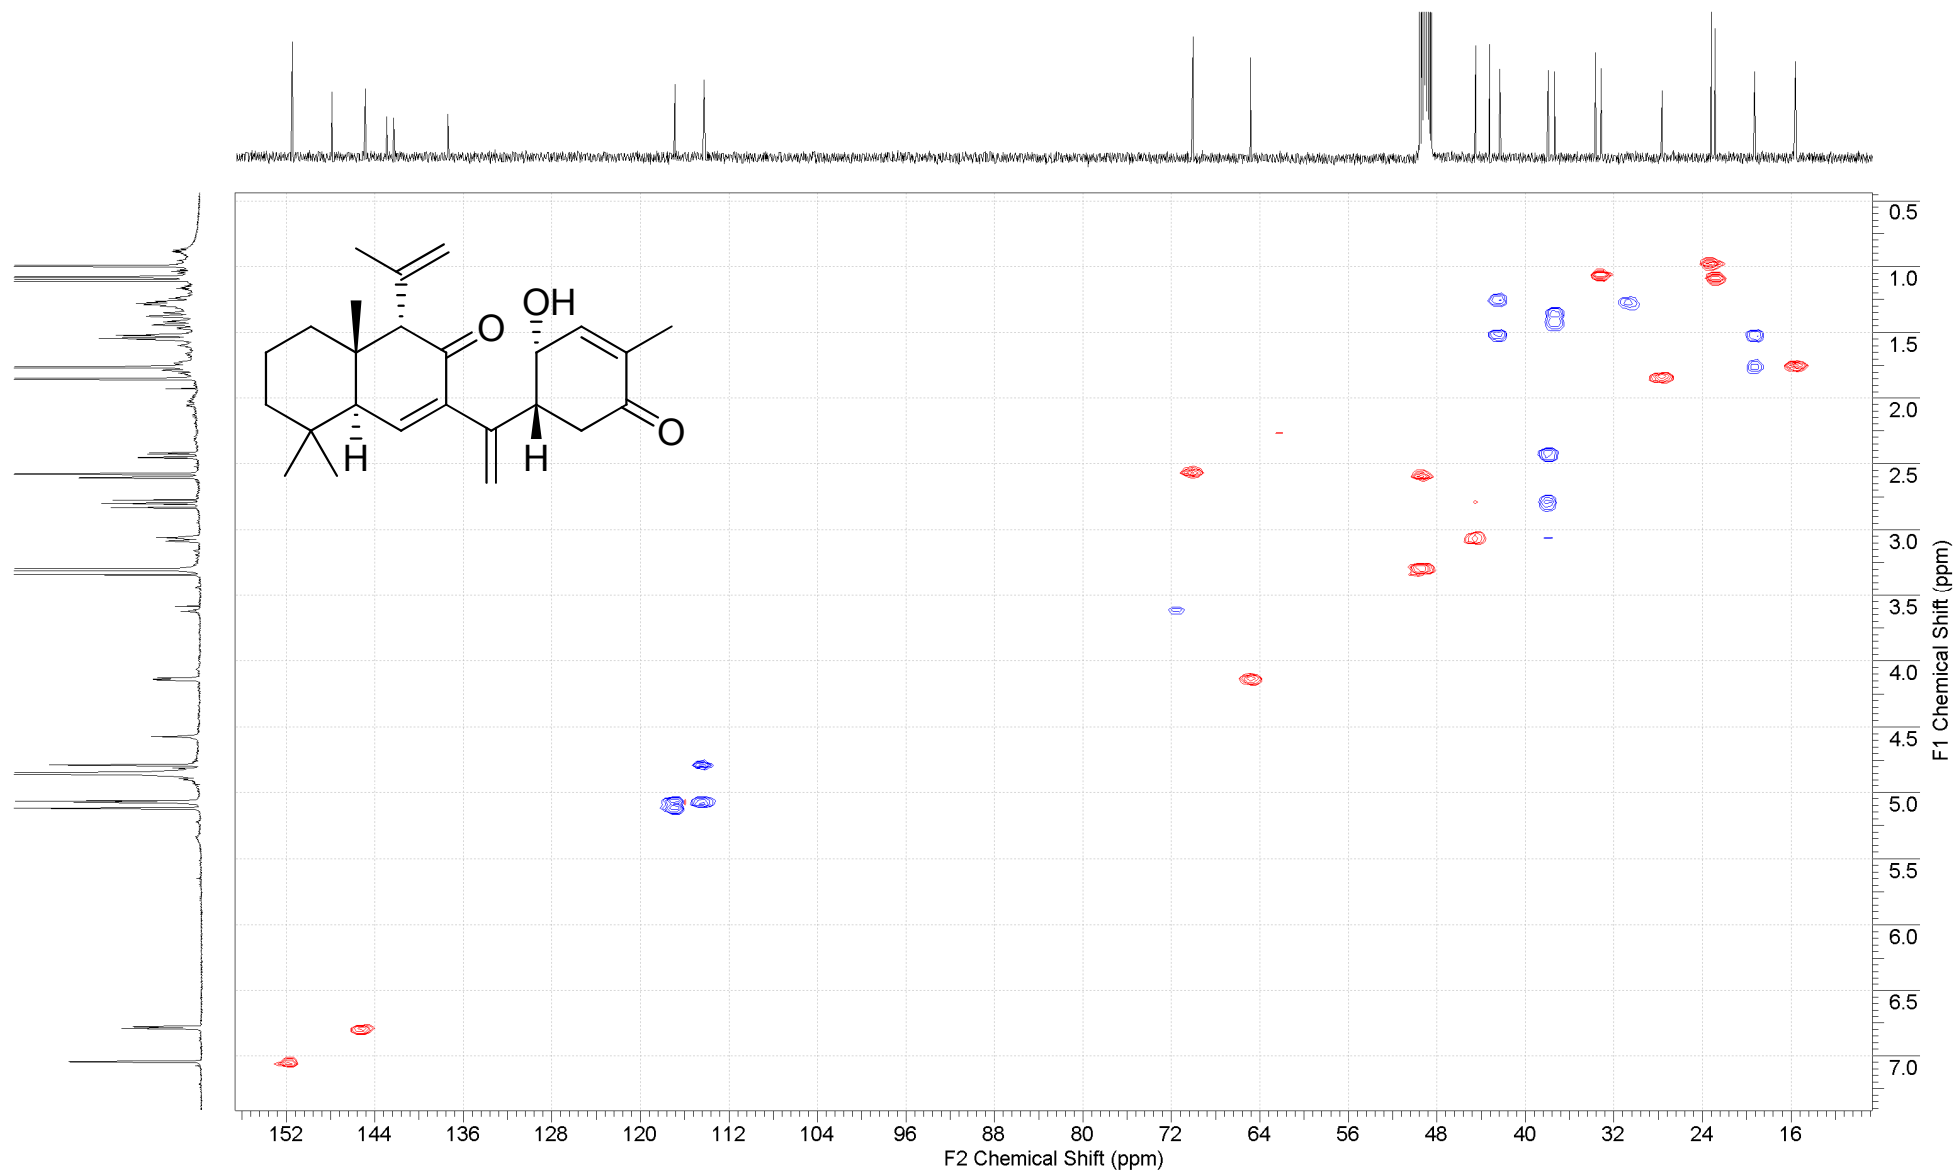

**Figure S6. HSQC NMR spectrum of phorbasone A (1) in CD<sub>3</sub>OD (Red: CH + CH<sub>3</sub>, Blue: CH<sub>2</sub>).**

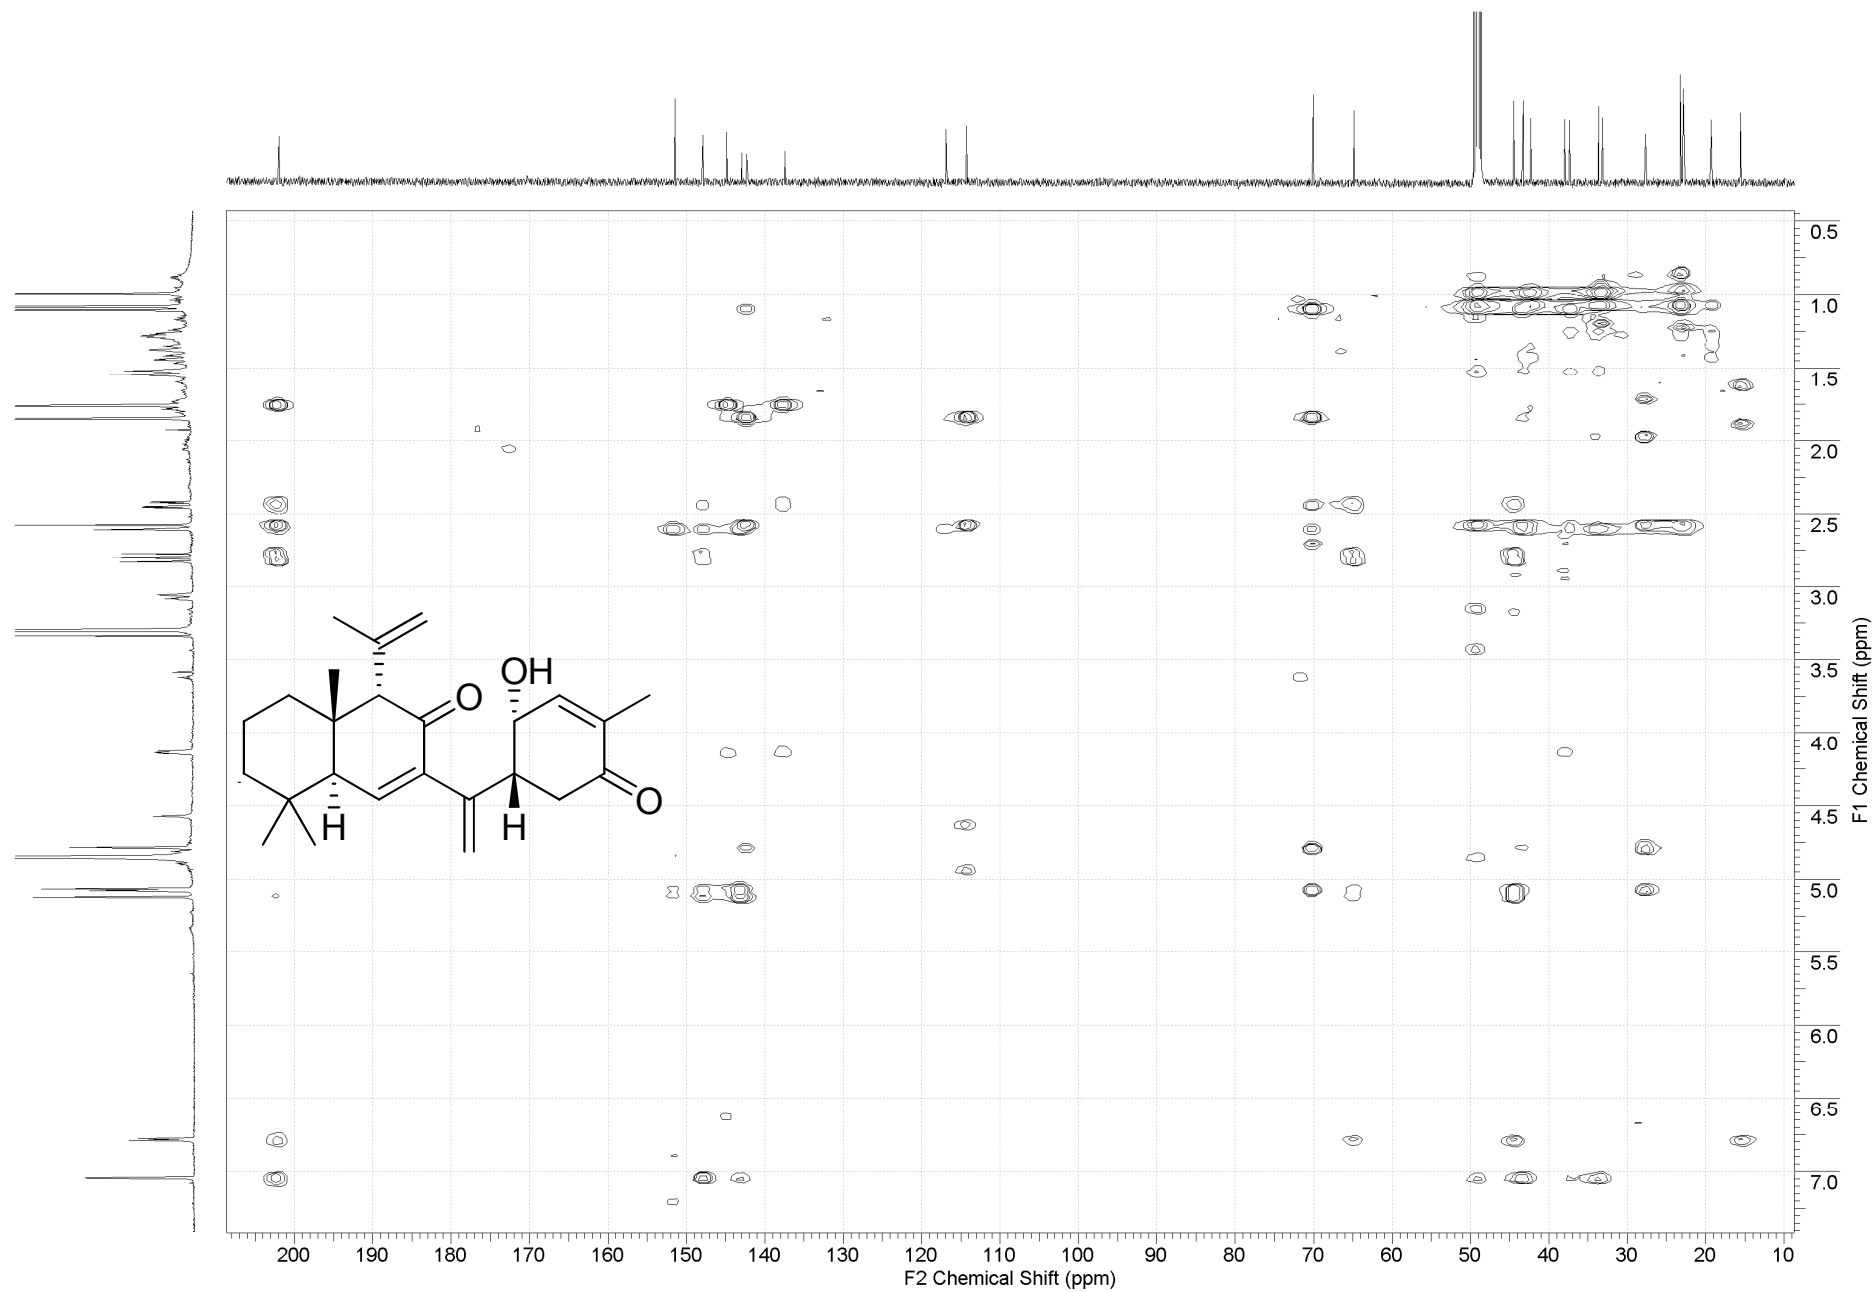

**Figure S7. HMBC NMR spectrum of phorbasone A (1) in CD<sub>3</sub>OD.**

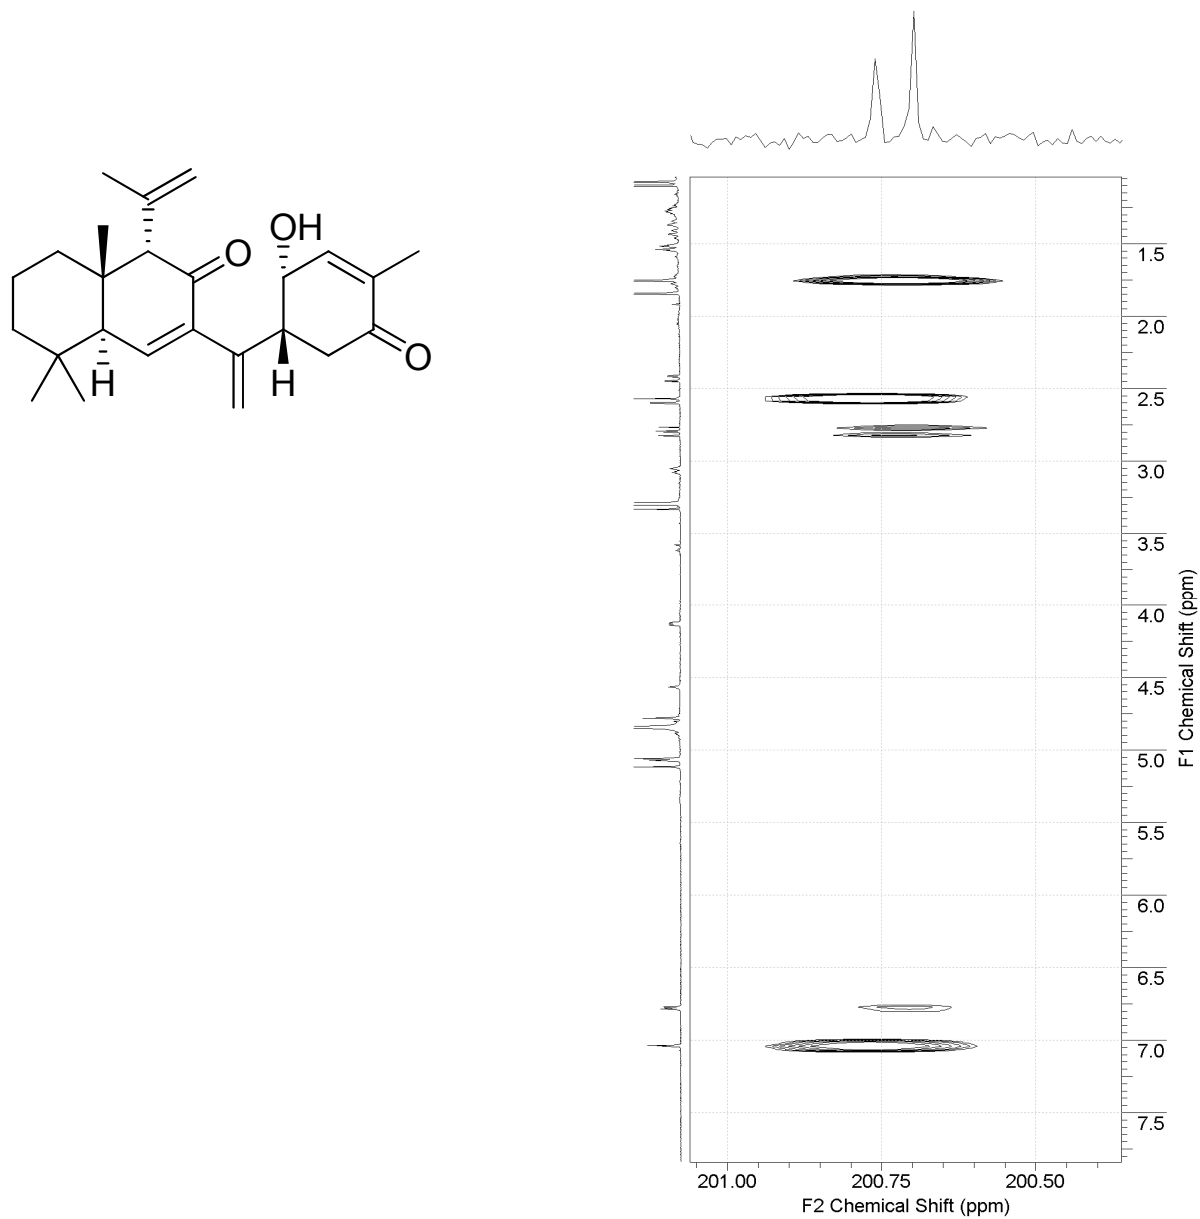

**Figure S8. Selective HMBC NMR spectrum (doenfield area) of phorbasone A (1) in CD<sub>3</sub>OD.**

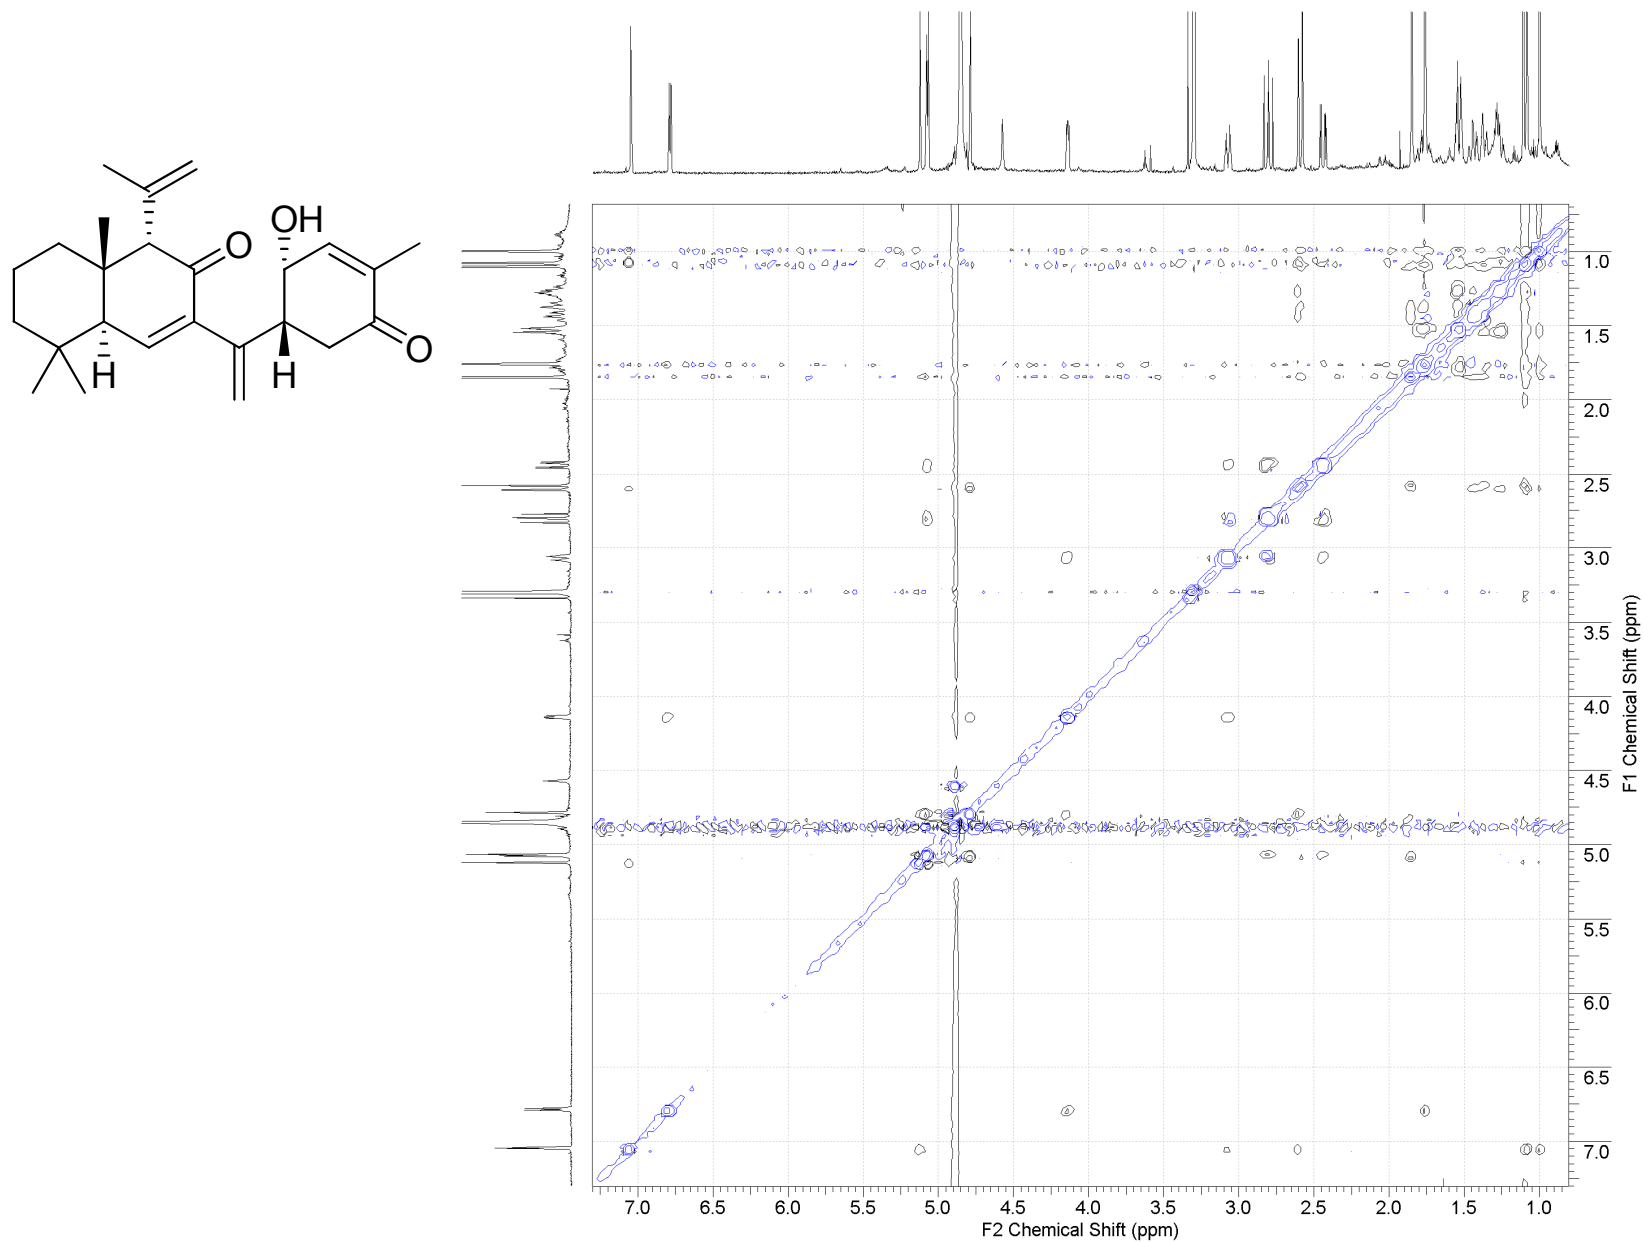

**Figure S9. NOESY NMR spectrum of phorbasone A (1) in CD<sub>3</sub>OD.**

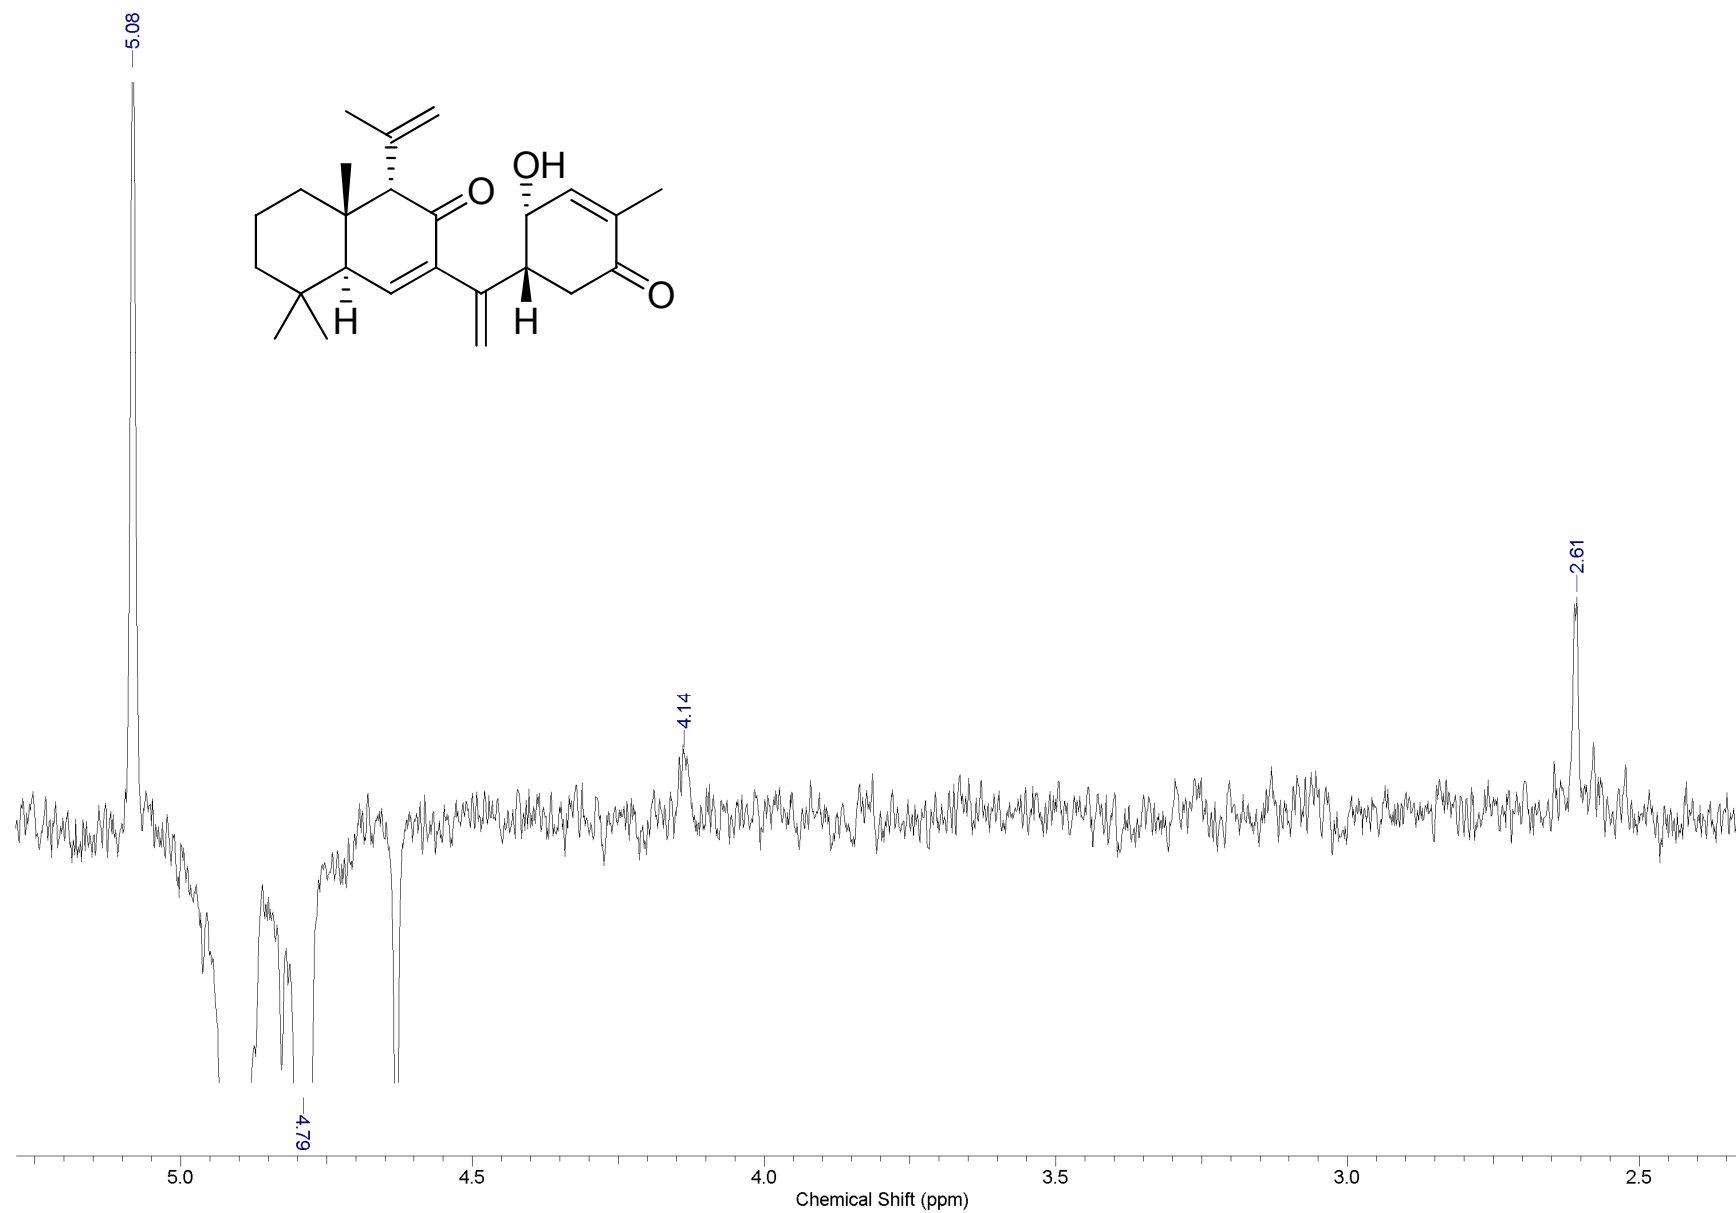

**Figure S10. NOESY1D NMR spectrum of phorbasone A (1) irradiated at  $\delta$  4.79 in CD<sub>3</sub>OD.**

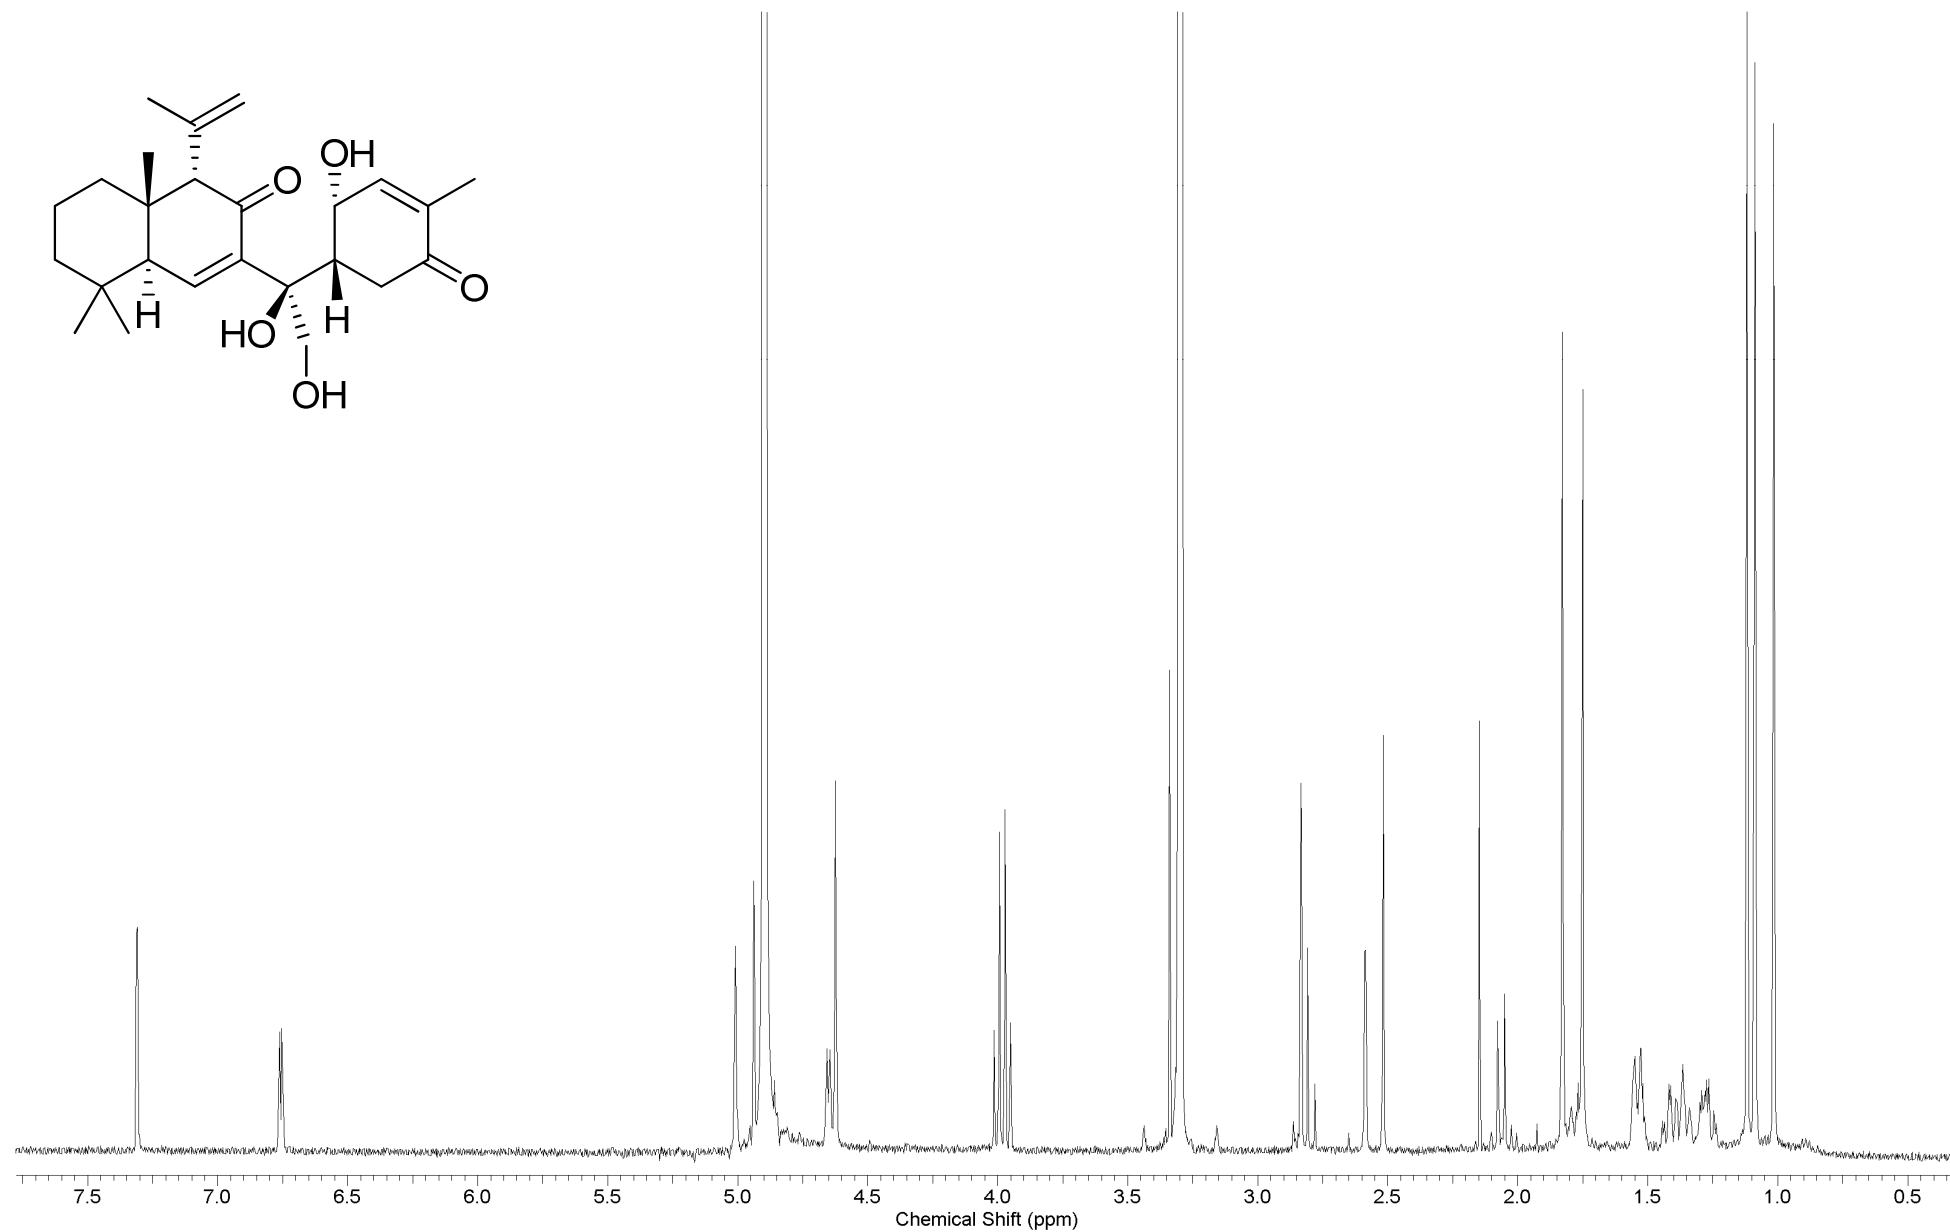

**Figure S11.  $^1\text{H}$  NMR spectrum of phorbasone B (2) in  $\text{CD}_3\text{OD}$ .**

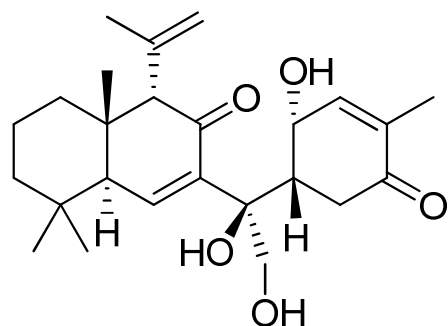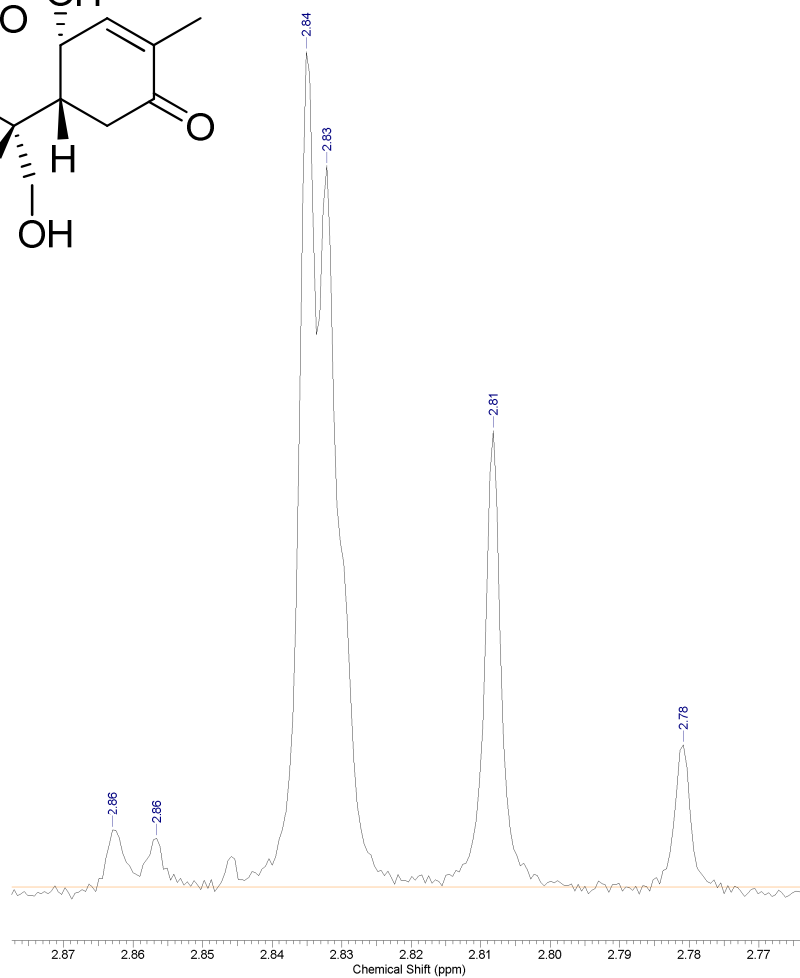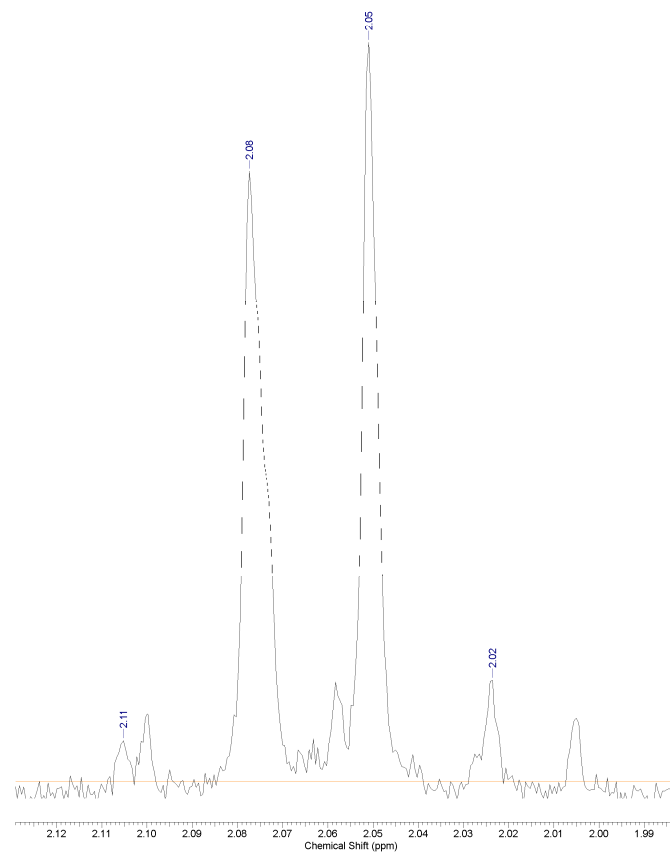

**Figure S12. Expanded  $^1\text{H}$  NMR spectrum of phorbasone B (2) in  $\text{CD}_3\text{OD}$ .**

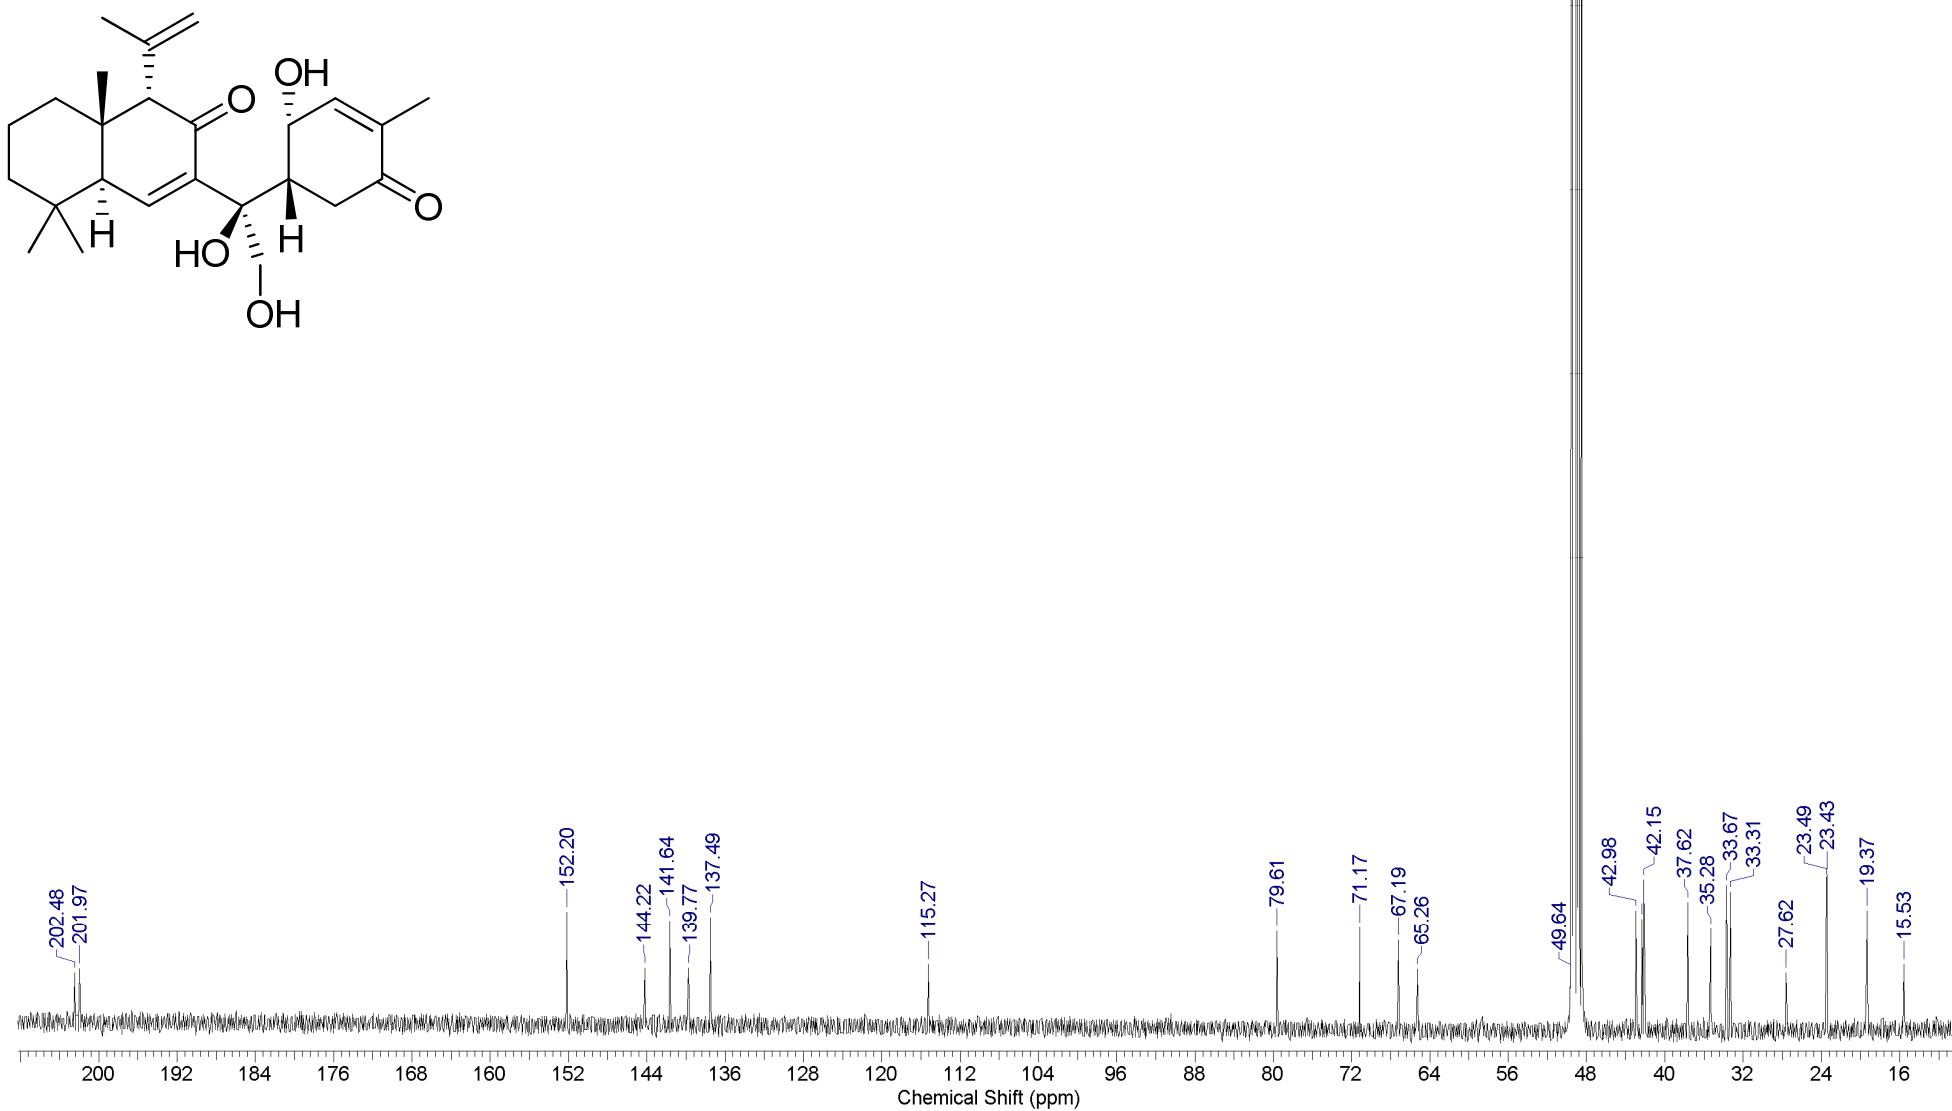

Figure S13.  $^{13}\text{C}$  NMR spectrum of phorbasonone B (2) in  $\text{CD}_3\text{OD}$ .

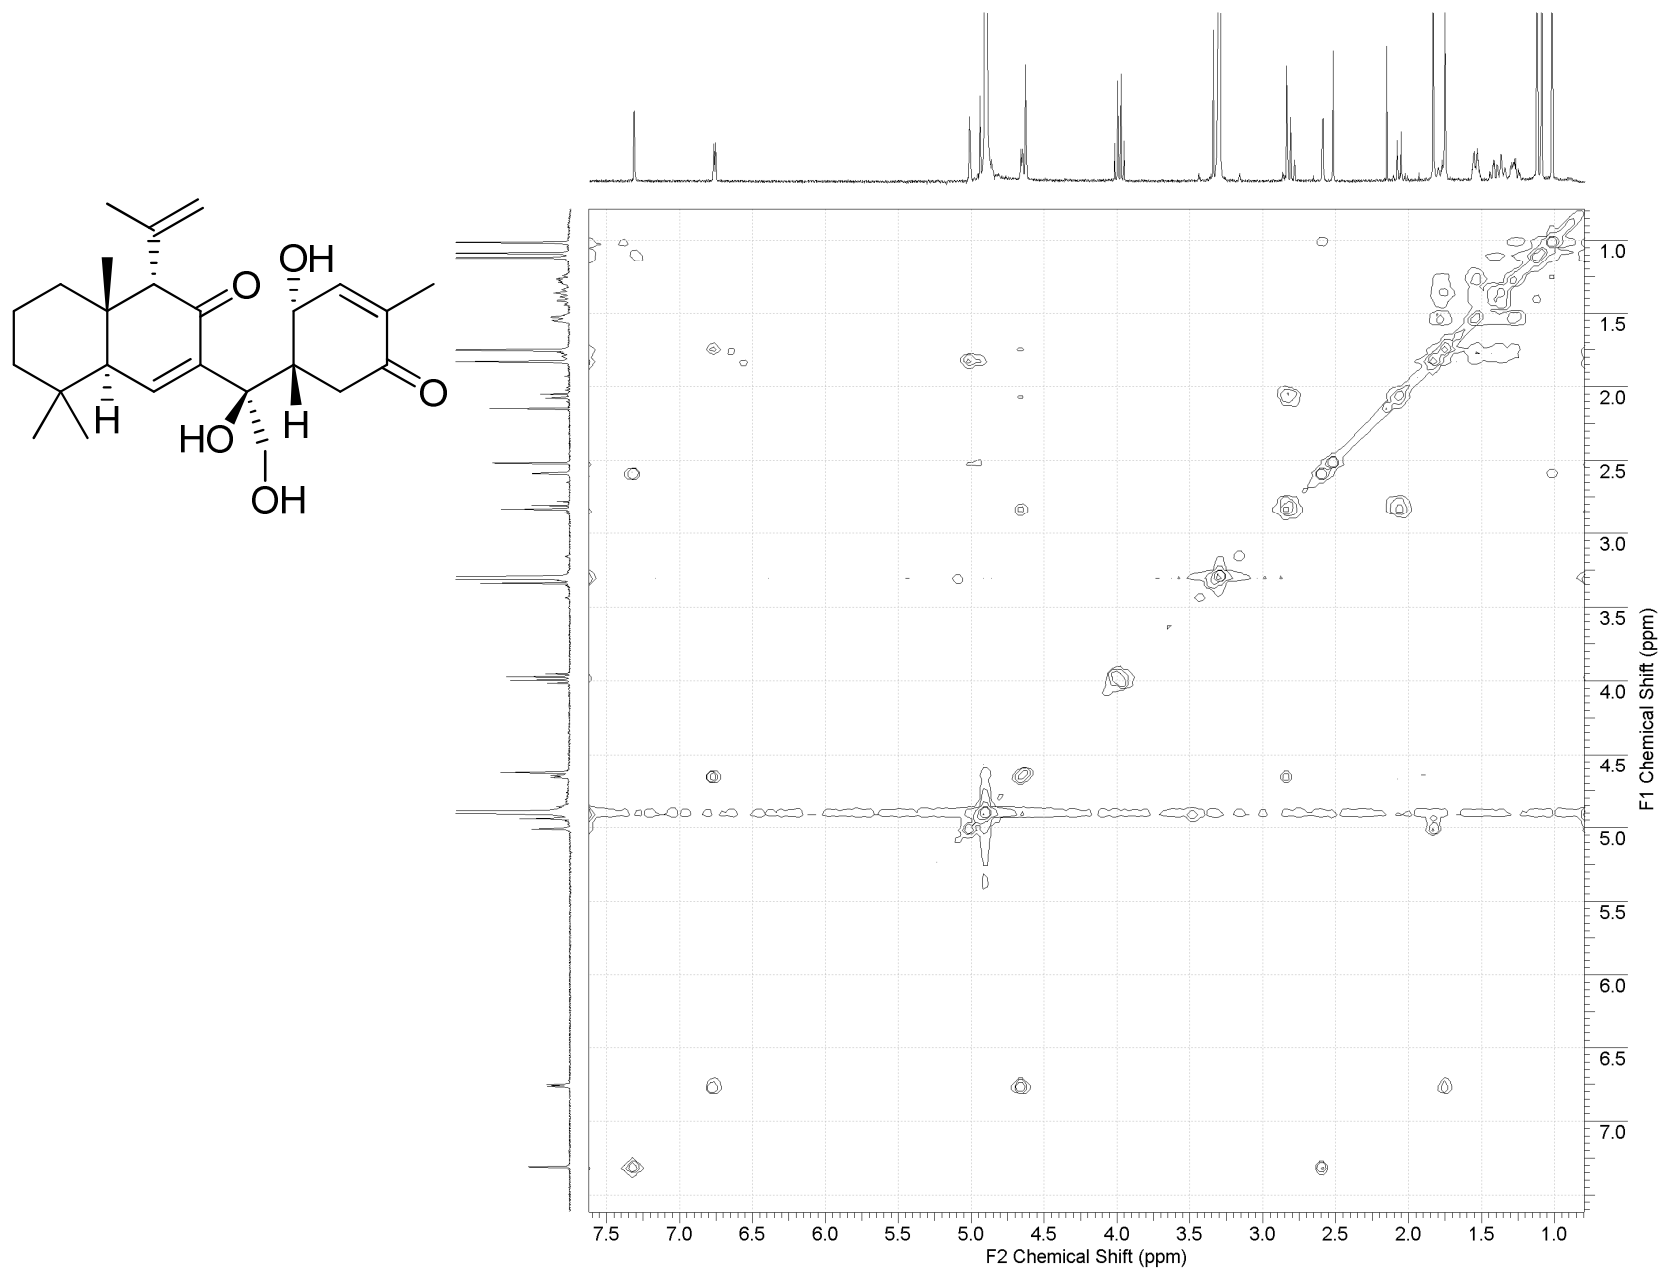

**Figure S14. COSY NMR spectrum of phorbasone B (2) in CD<sub>3</sub>OD.**

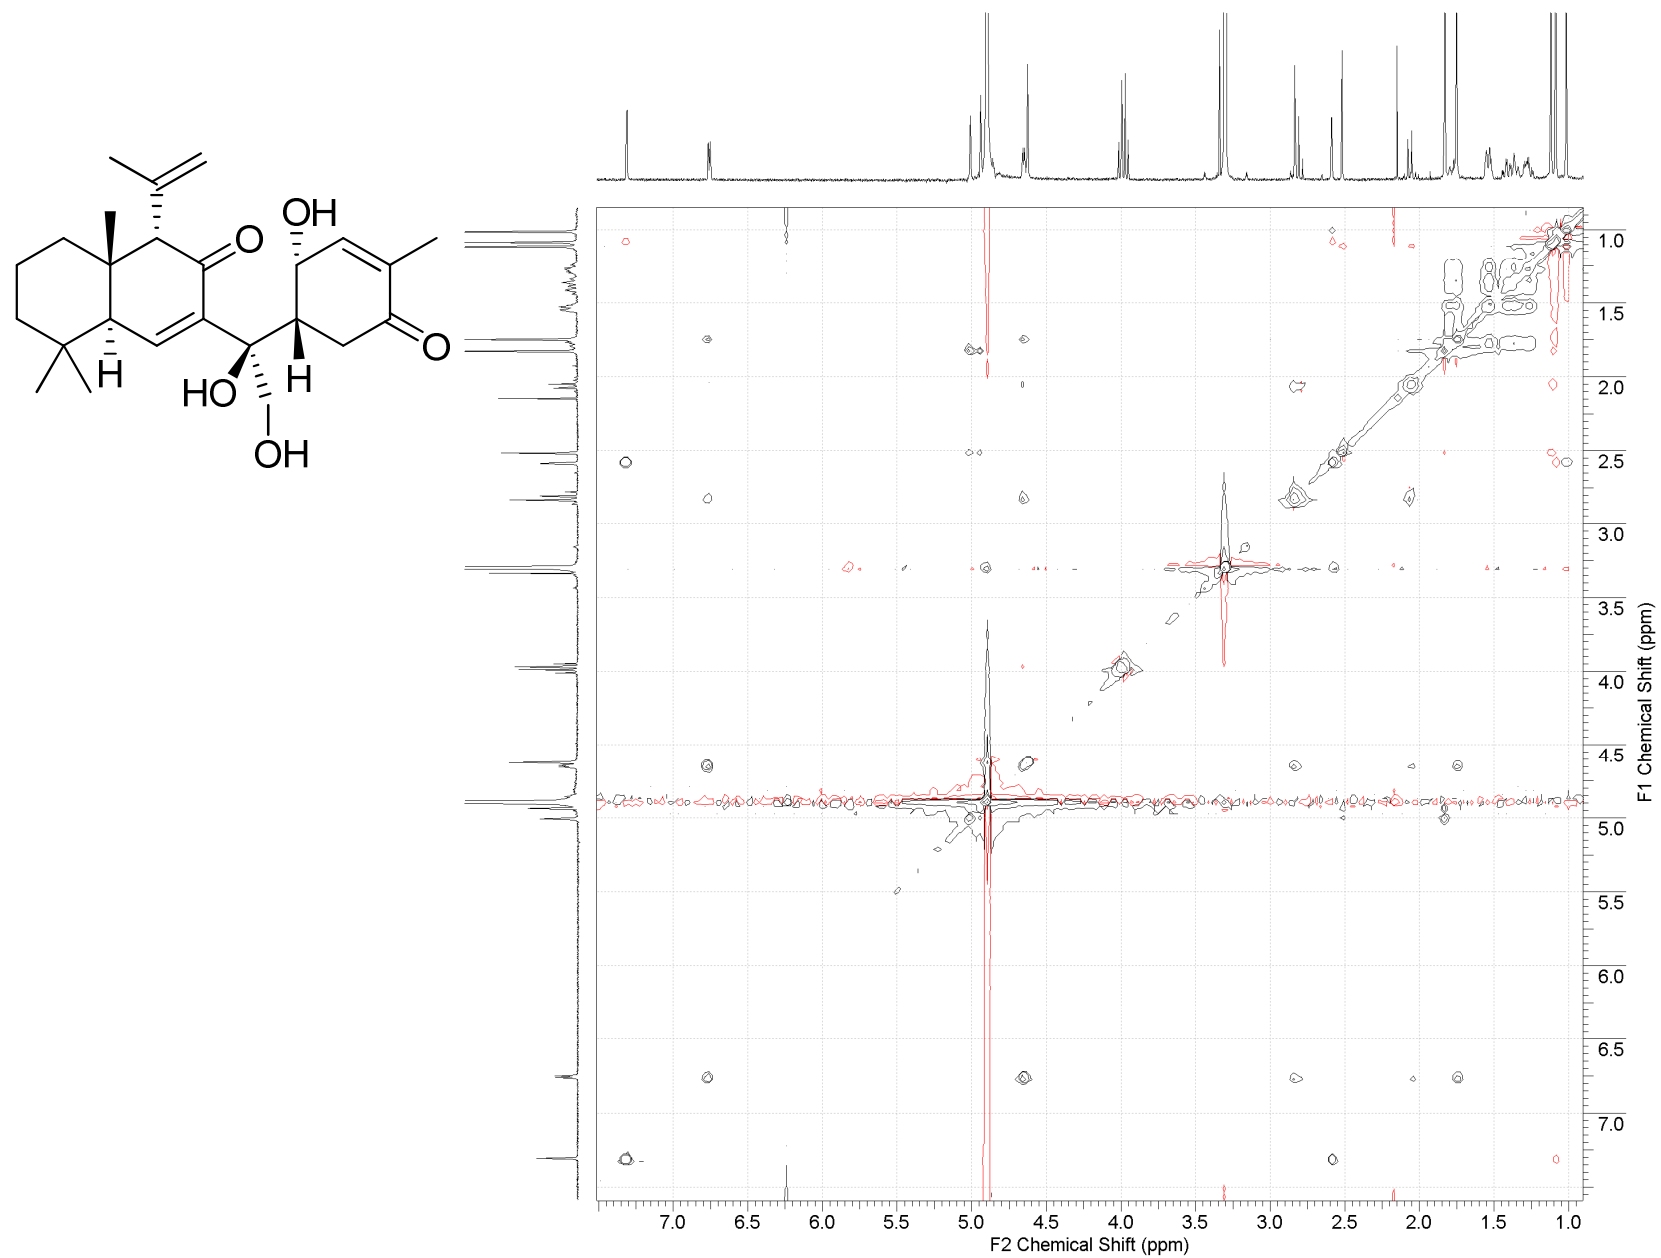

**Figure S15. TOCSY NMR spectrum of phorbasonone B (2) in CD<sub>3</sub>OD.**

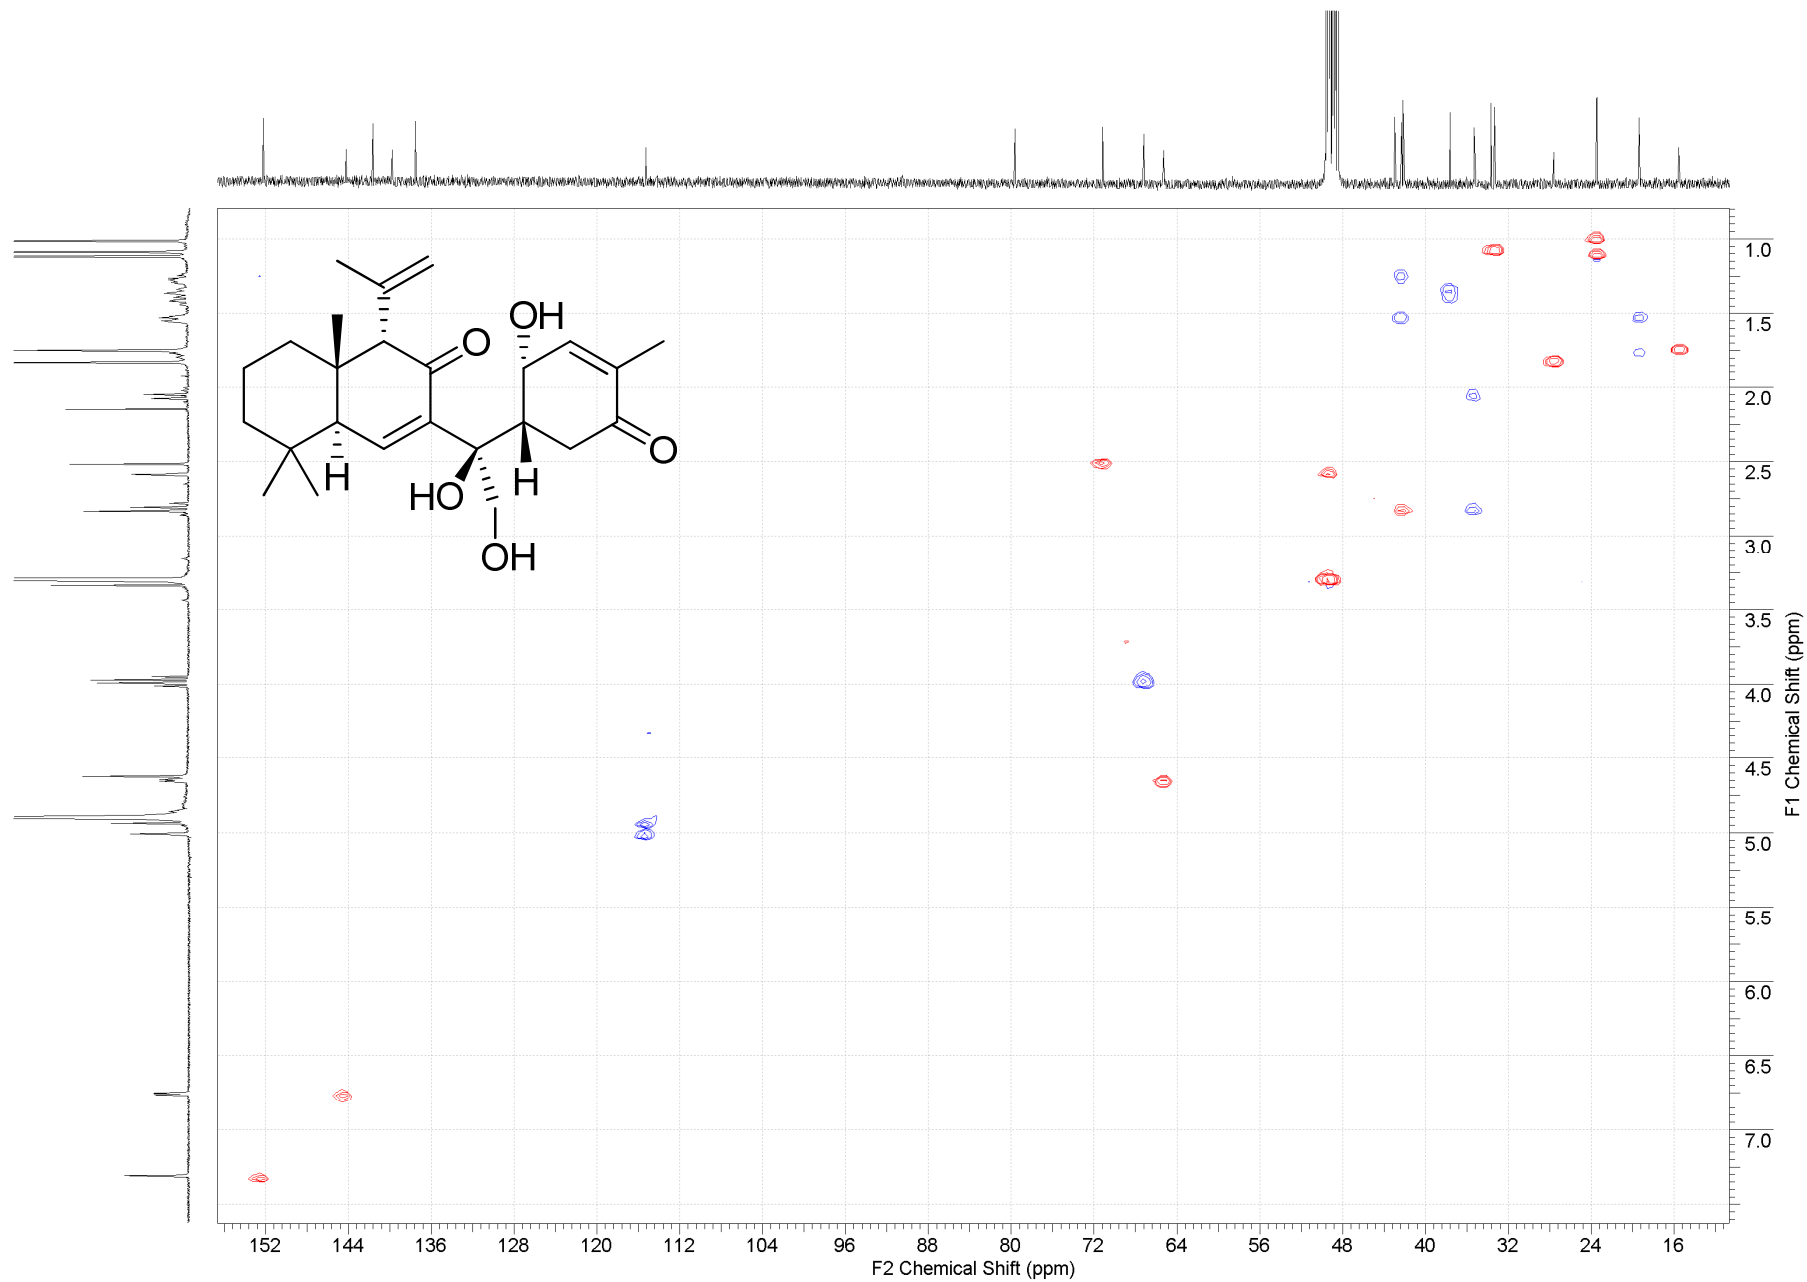

**Figure S16. HSQC NMR spectrum of phorbasone B (2) in CD<sub>3</sub>OD (Red: CH + CH<sub>3</sub>, Blue: CH<sub>2</sub>).**

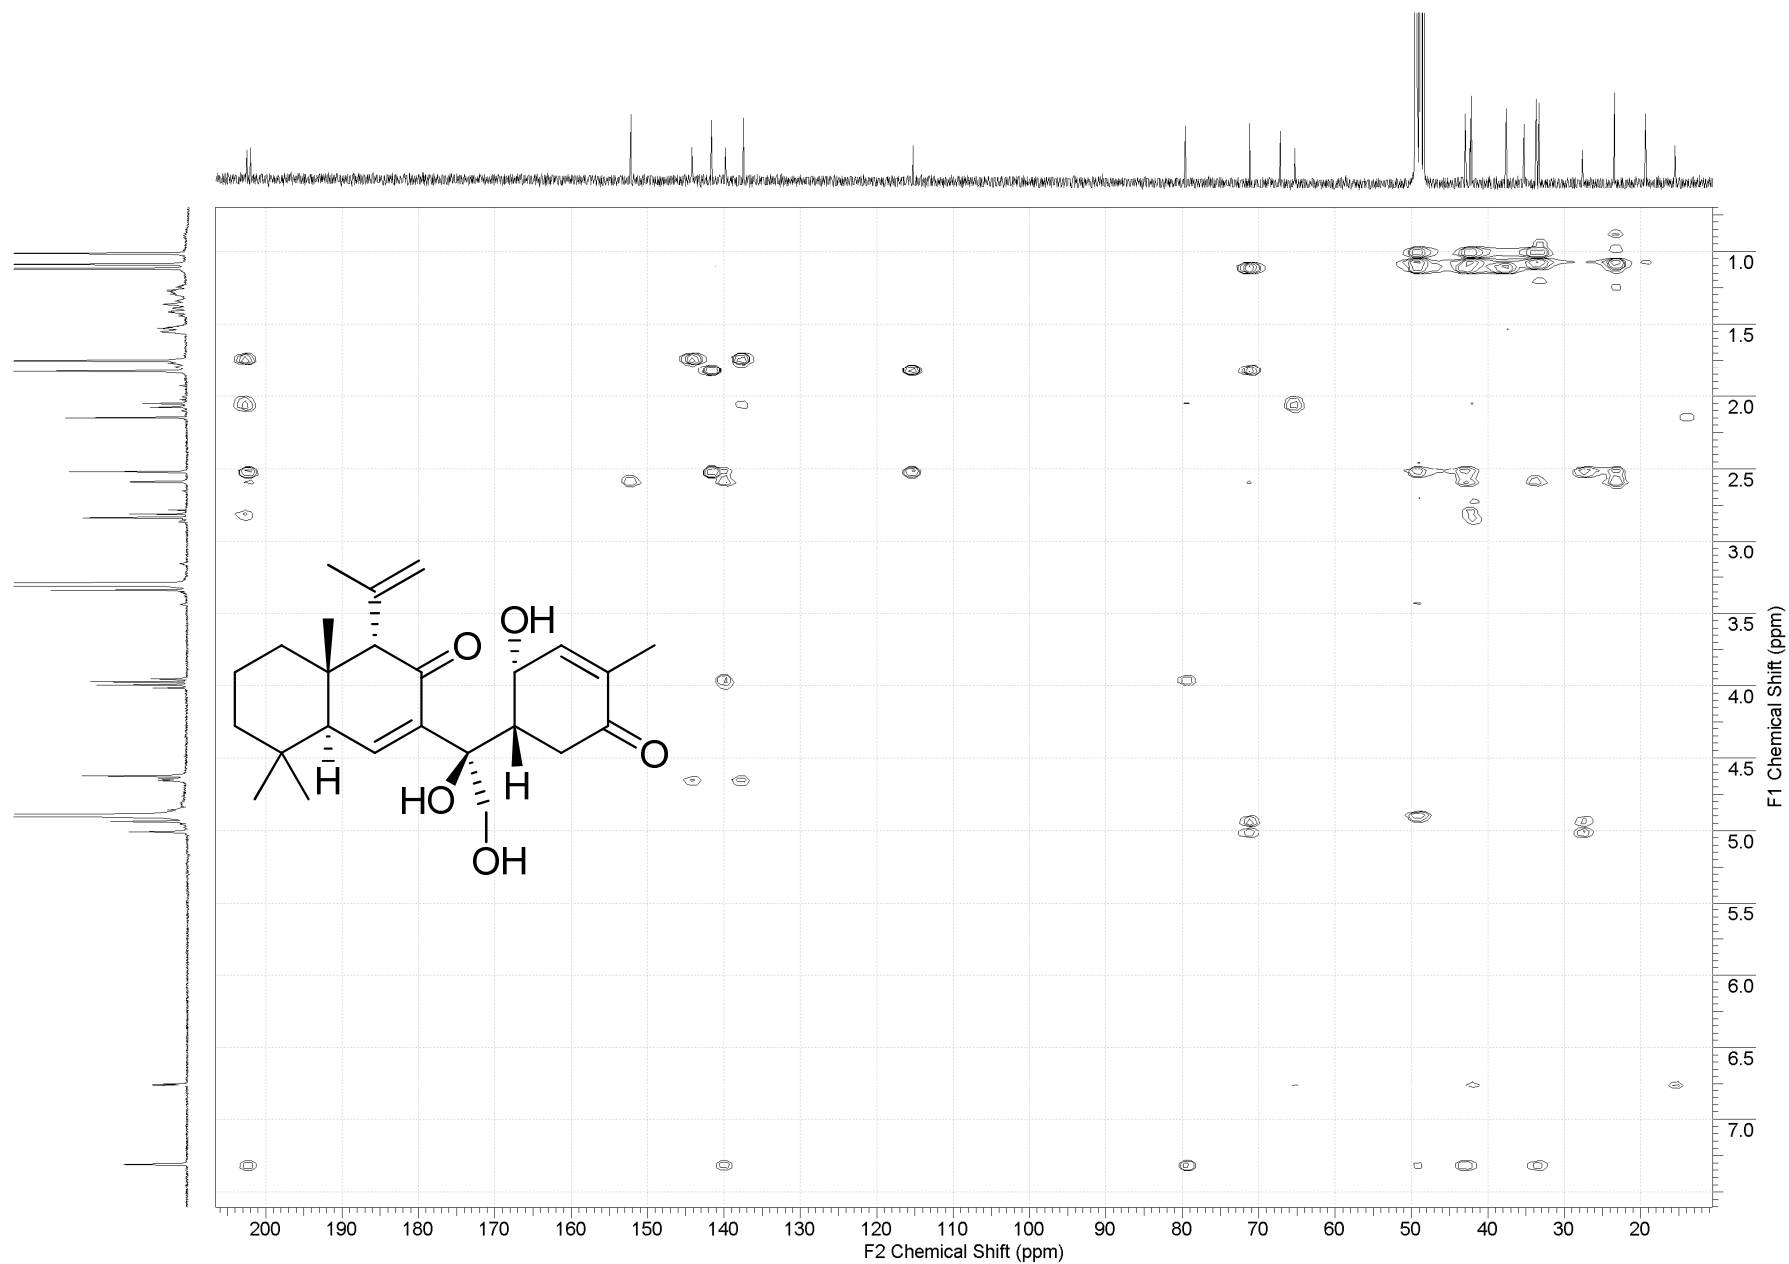

**Figure S17. HMBC NMR spectrum of phorbasonone B (2) in  $\text{CD}_3\text{OD}$ .**

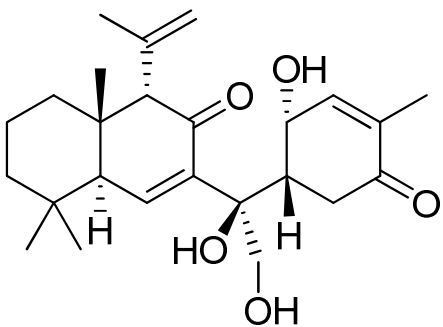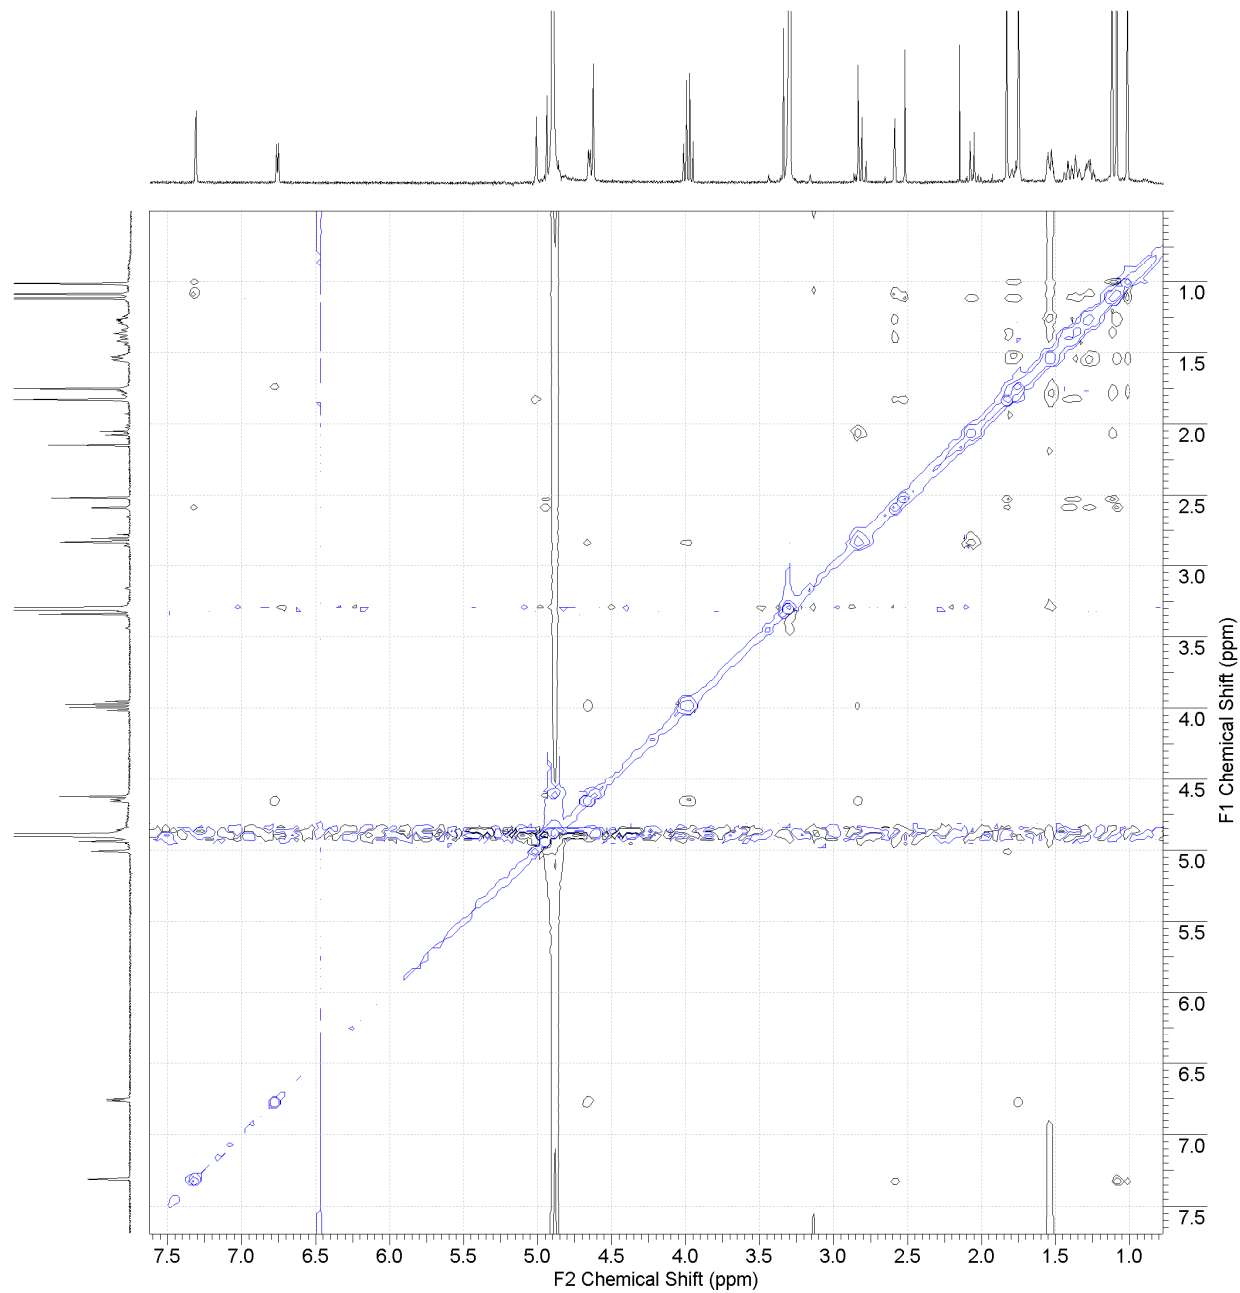

**Figure S18. NOESY NMR spectrum of phorbasonone B (2) in CD<sub>3</sub>OD.**

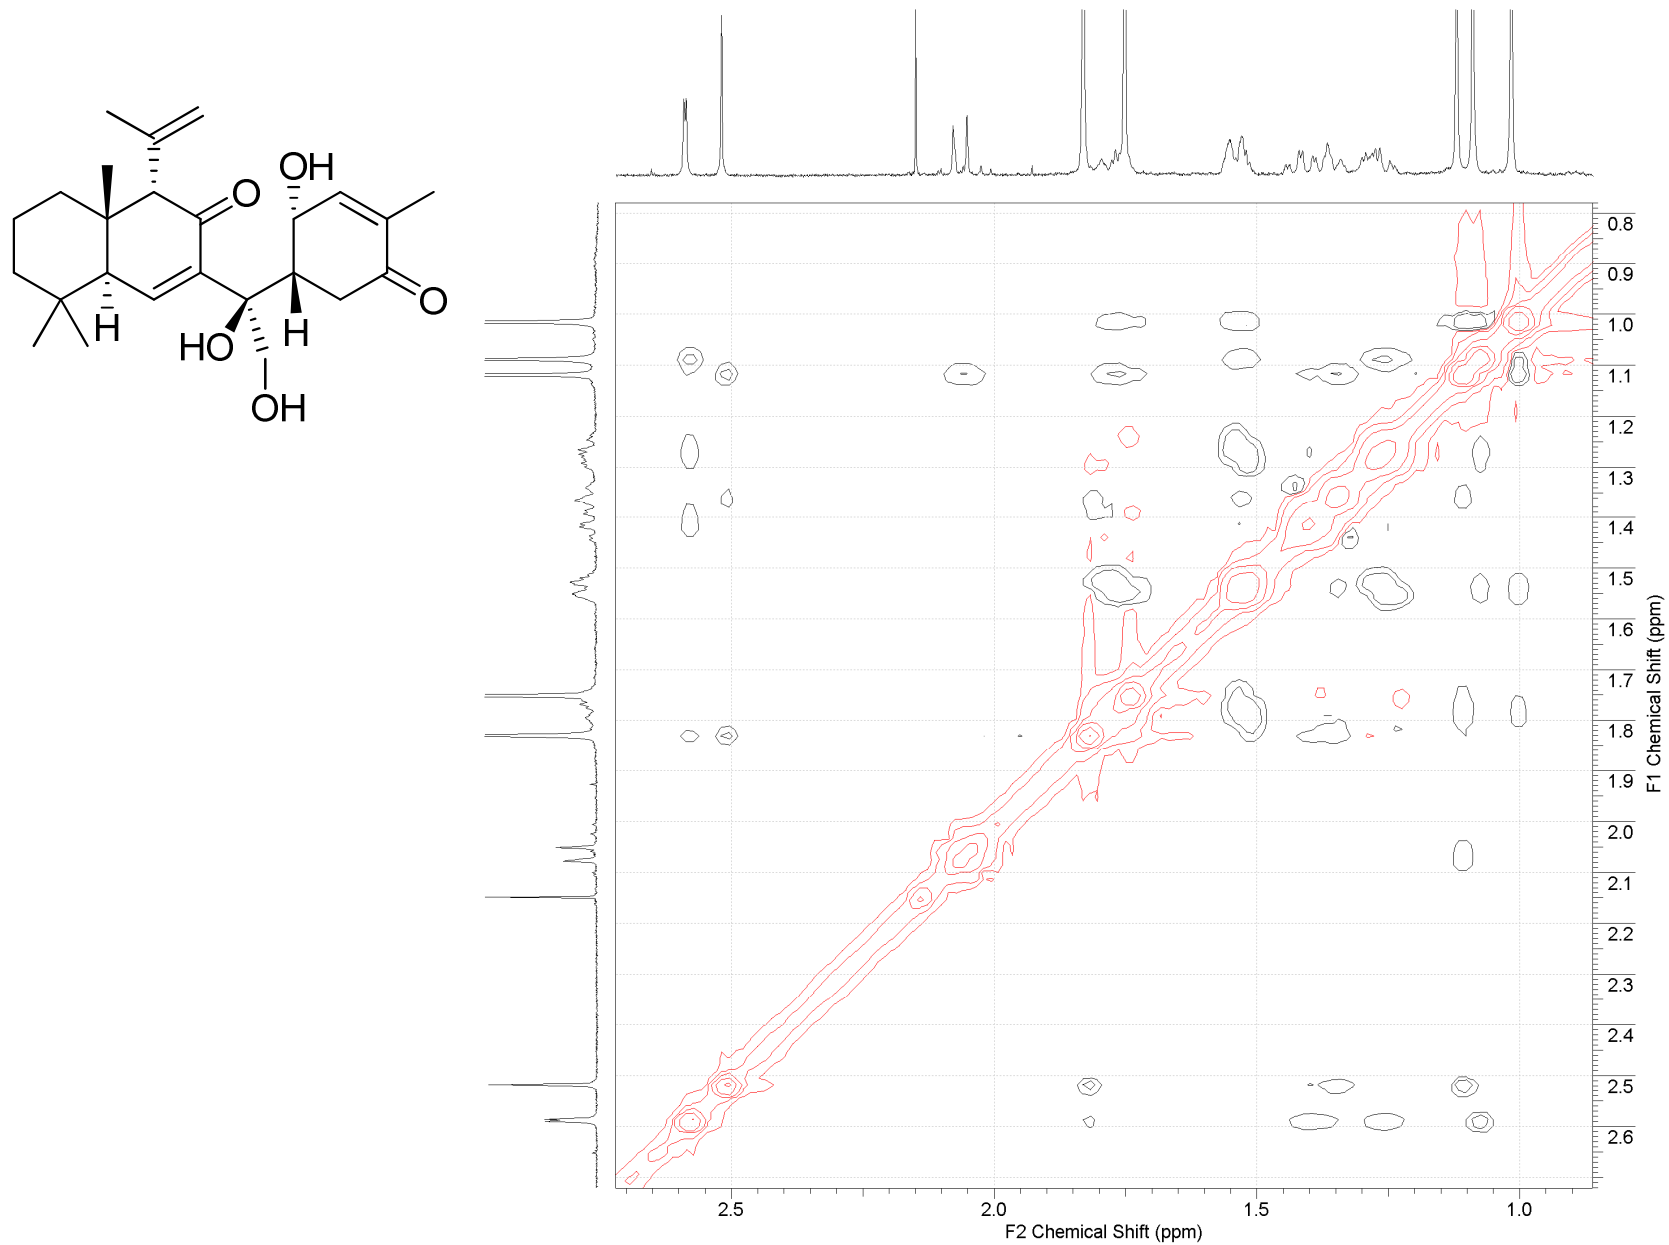

**Figure S19. Expanded NOESY NMR spectrum of phorbasone B (2) in CD<sub>3</sub>OD.**

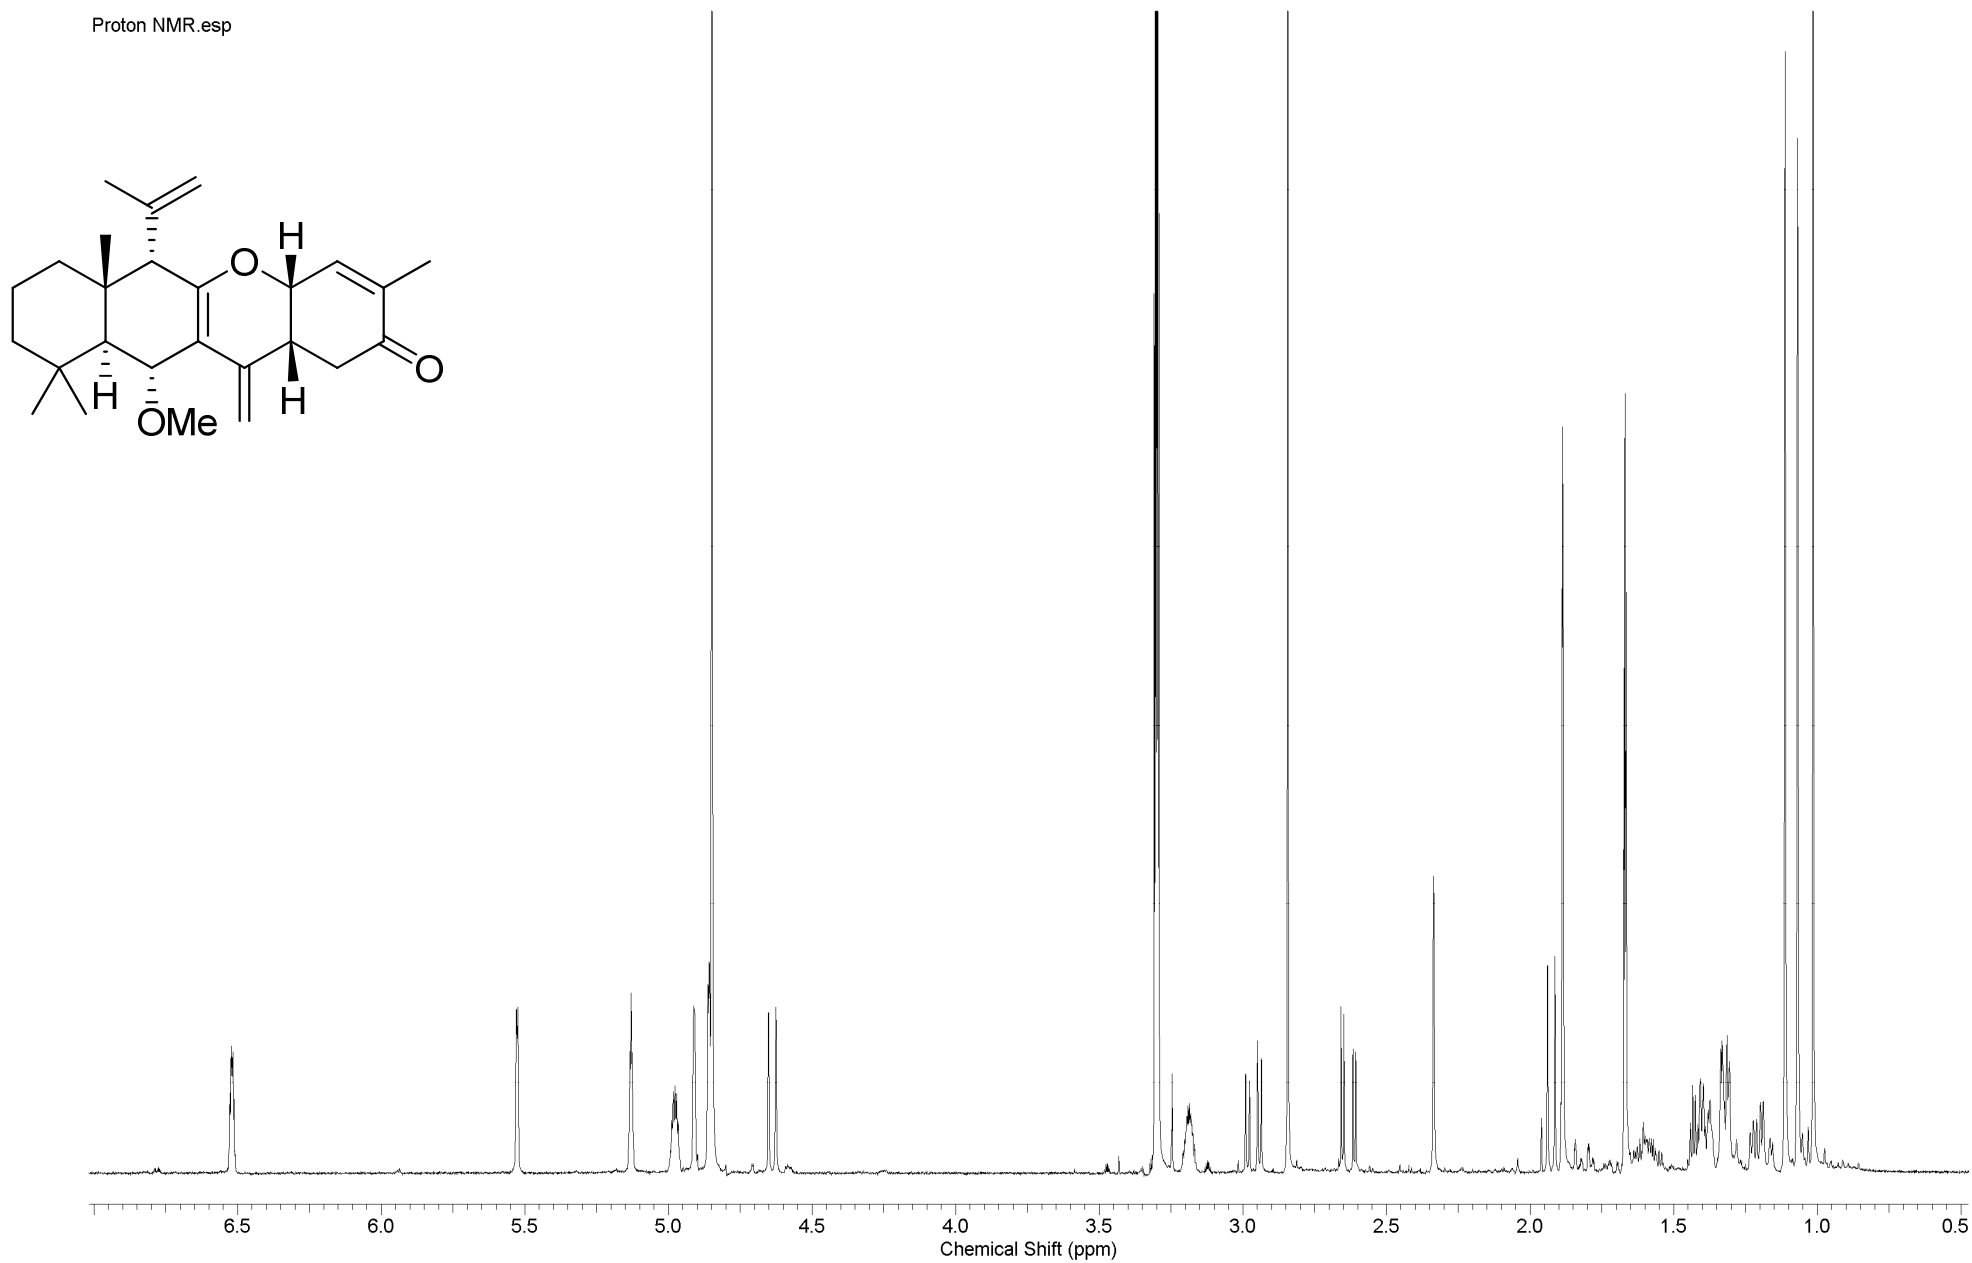

**Figure S20.**  $^1\text{H}$  NMR spectrum of cyclized phobasone A (3) in  $\text{CD}_3\text{OD}$ .

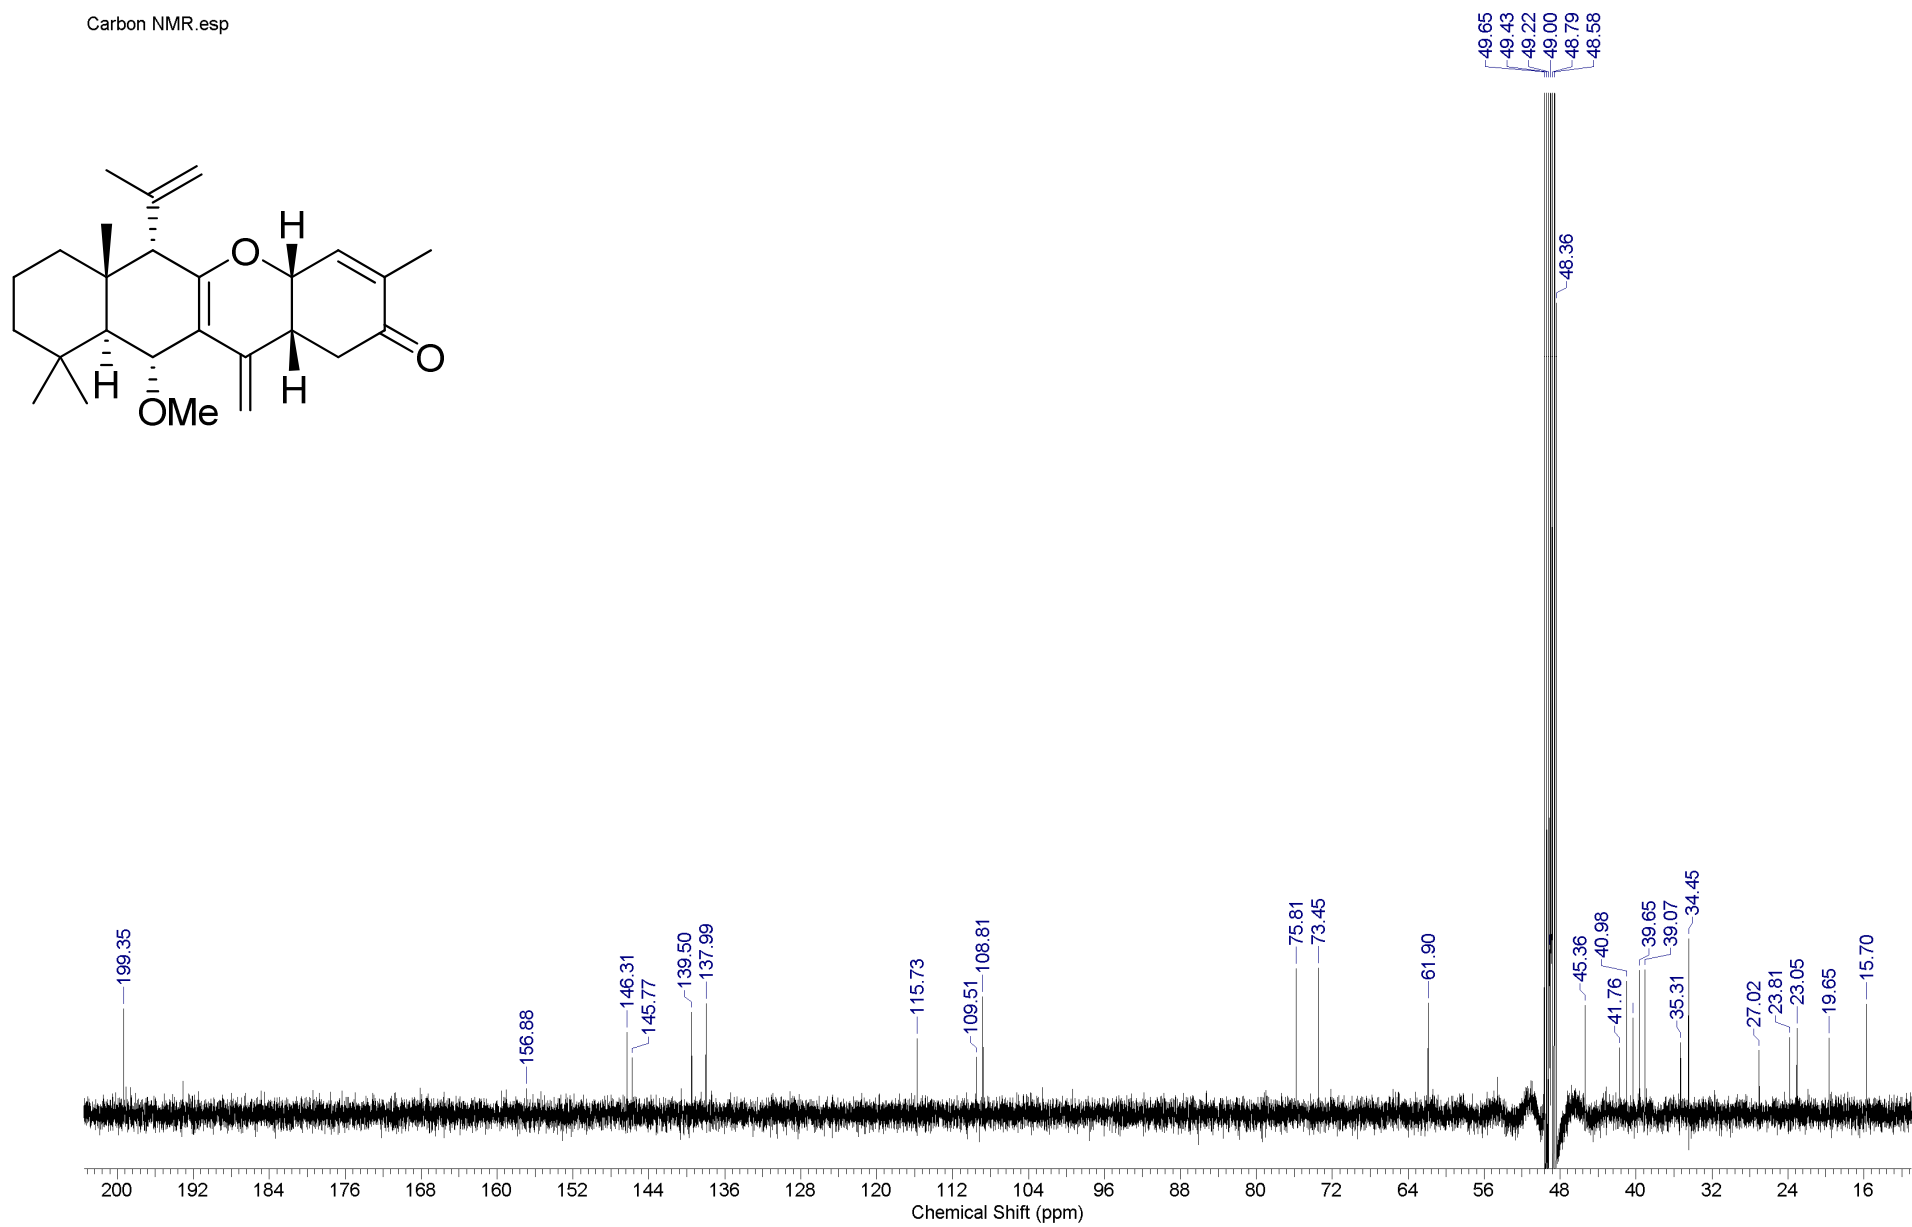

Figure S21. <sup>13</sup>C NMR spectrum of cyclized phobasone A (3) in CD<sub>3</sub>OD.

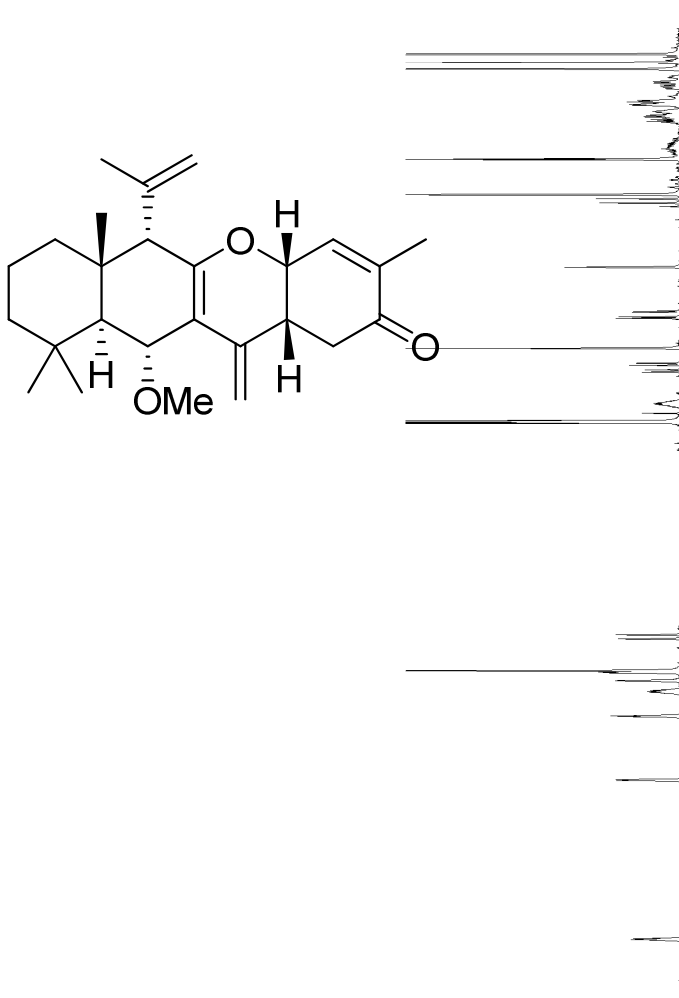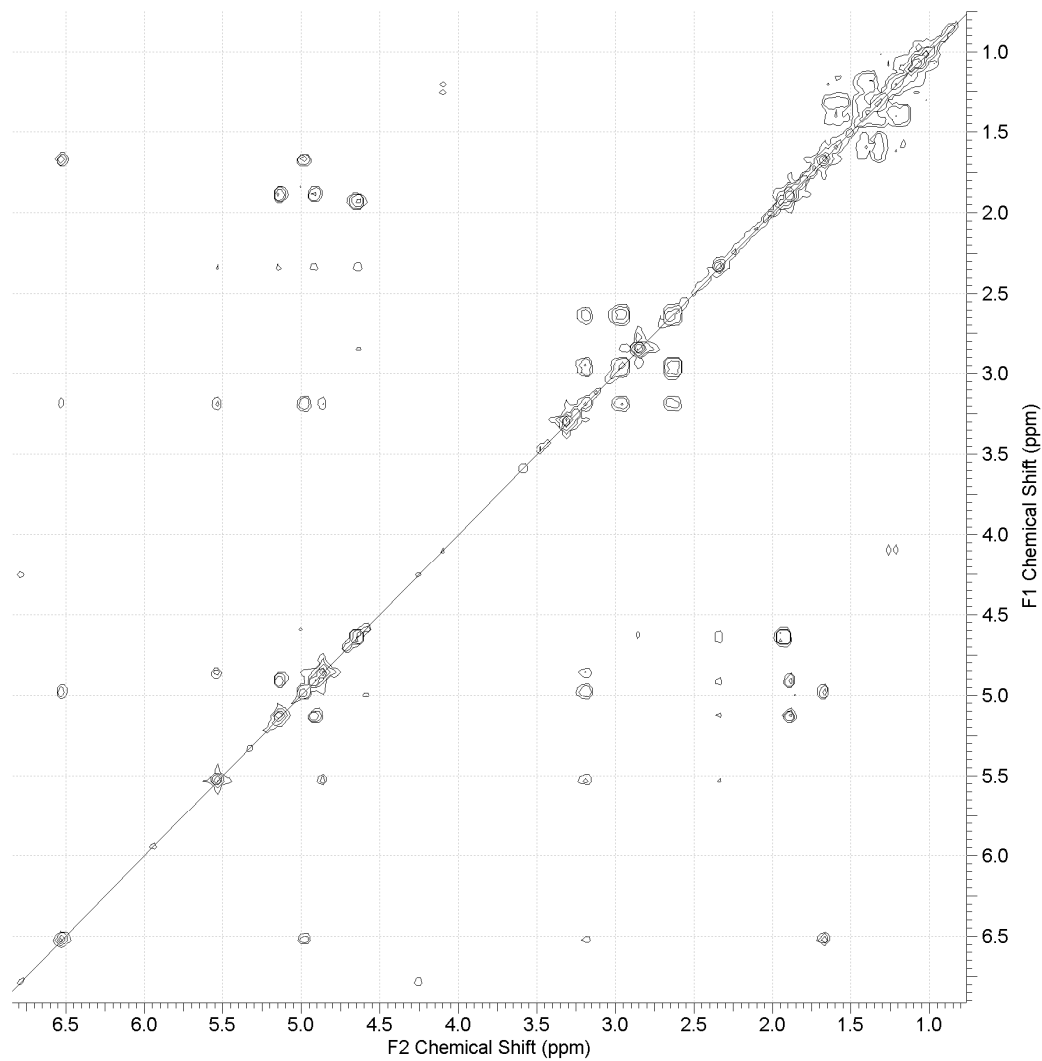

29

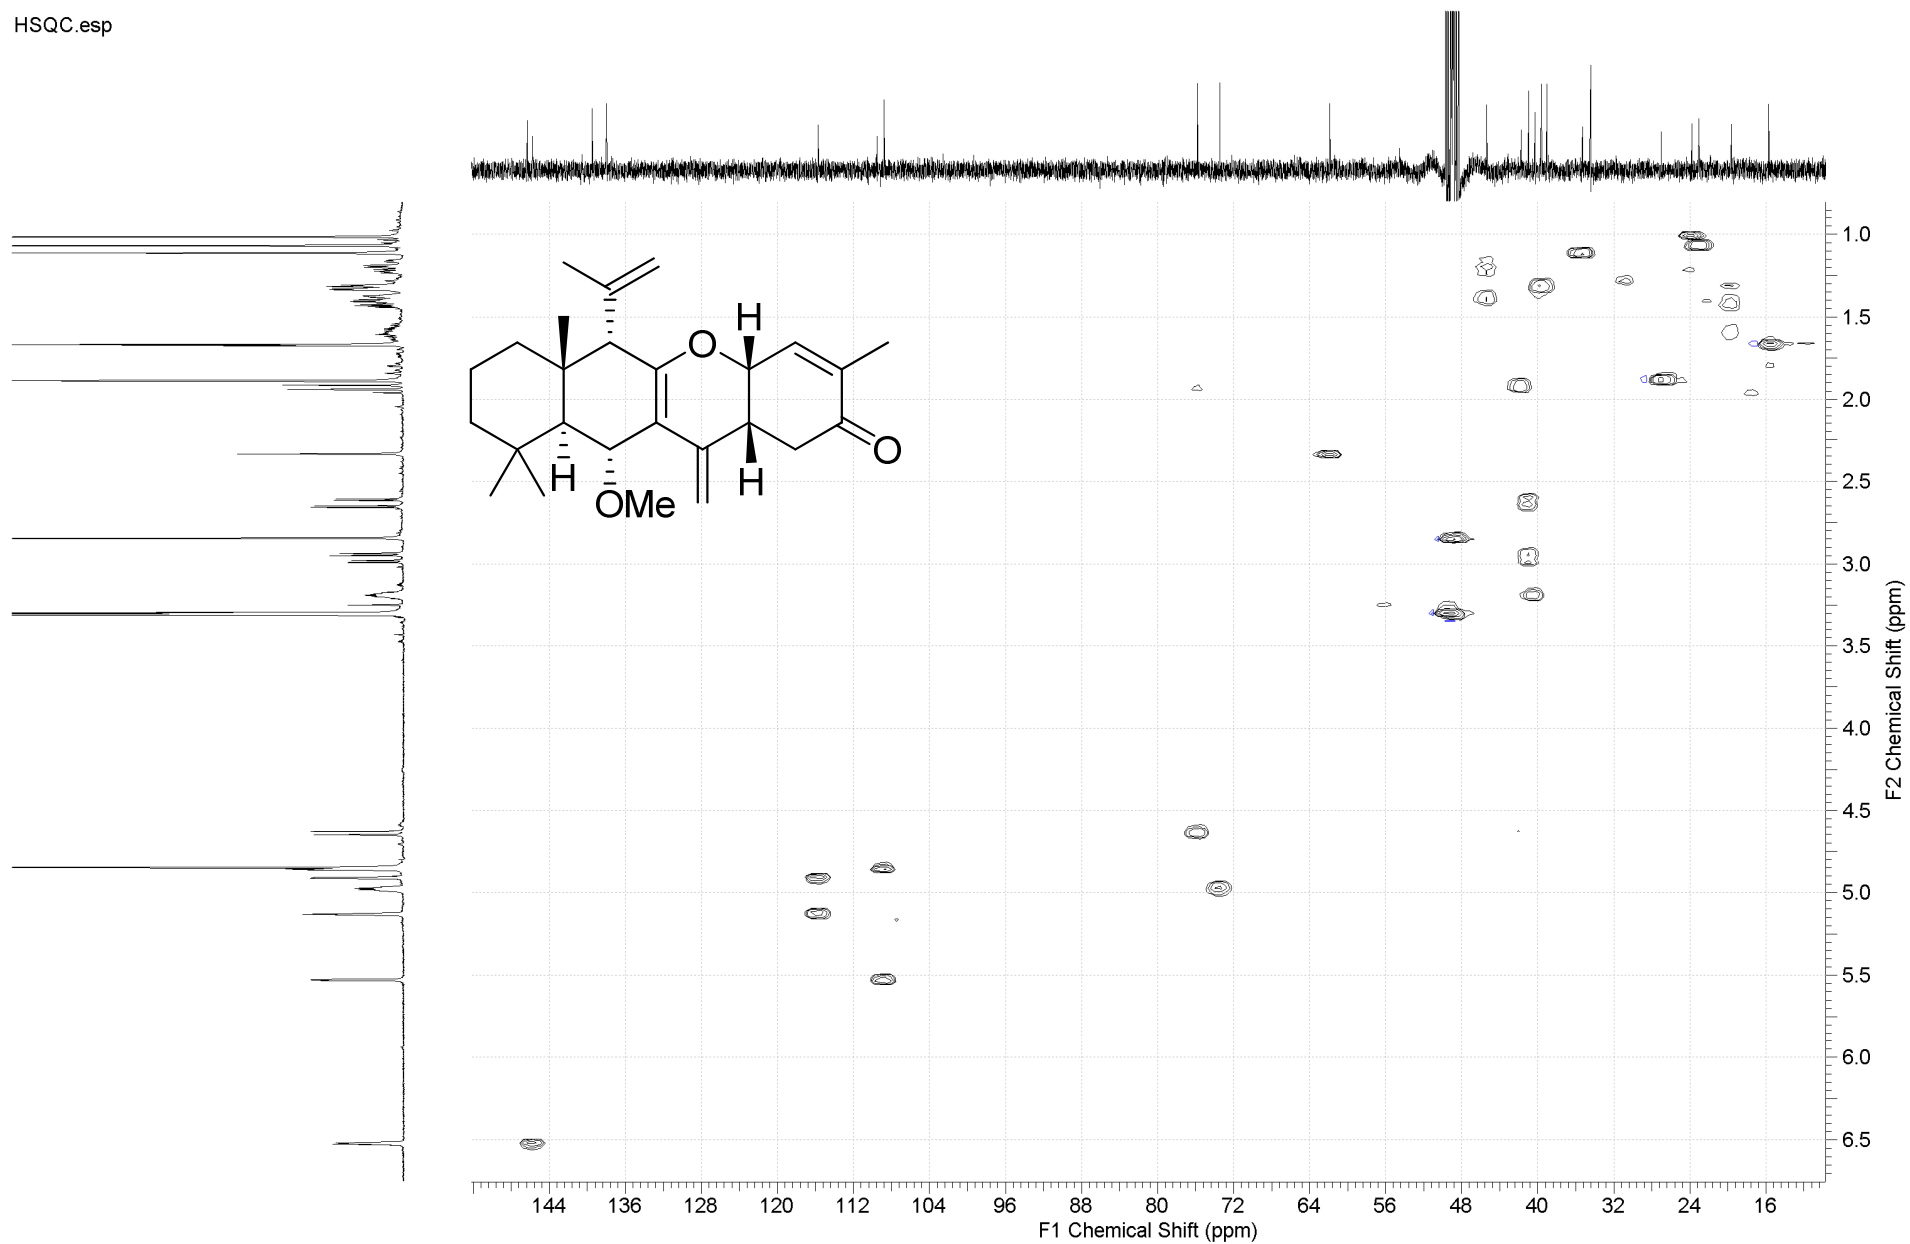

**Figure S23. HSQC NMR spectrum of cyclized phobasone A (3) in CD<sub>3</sub>OD.**

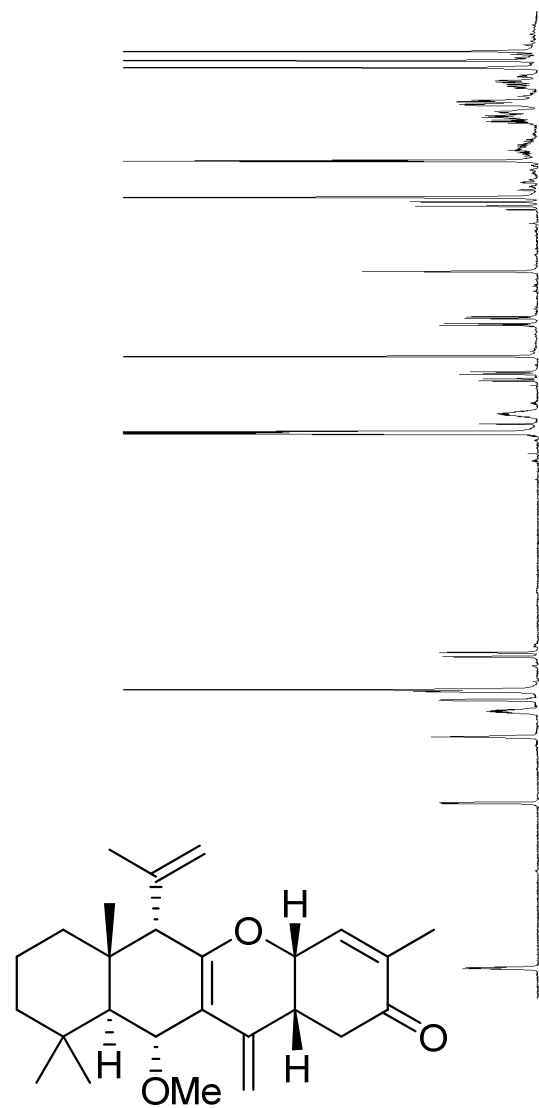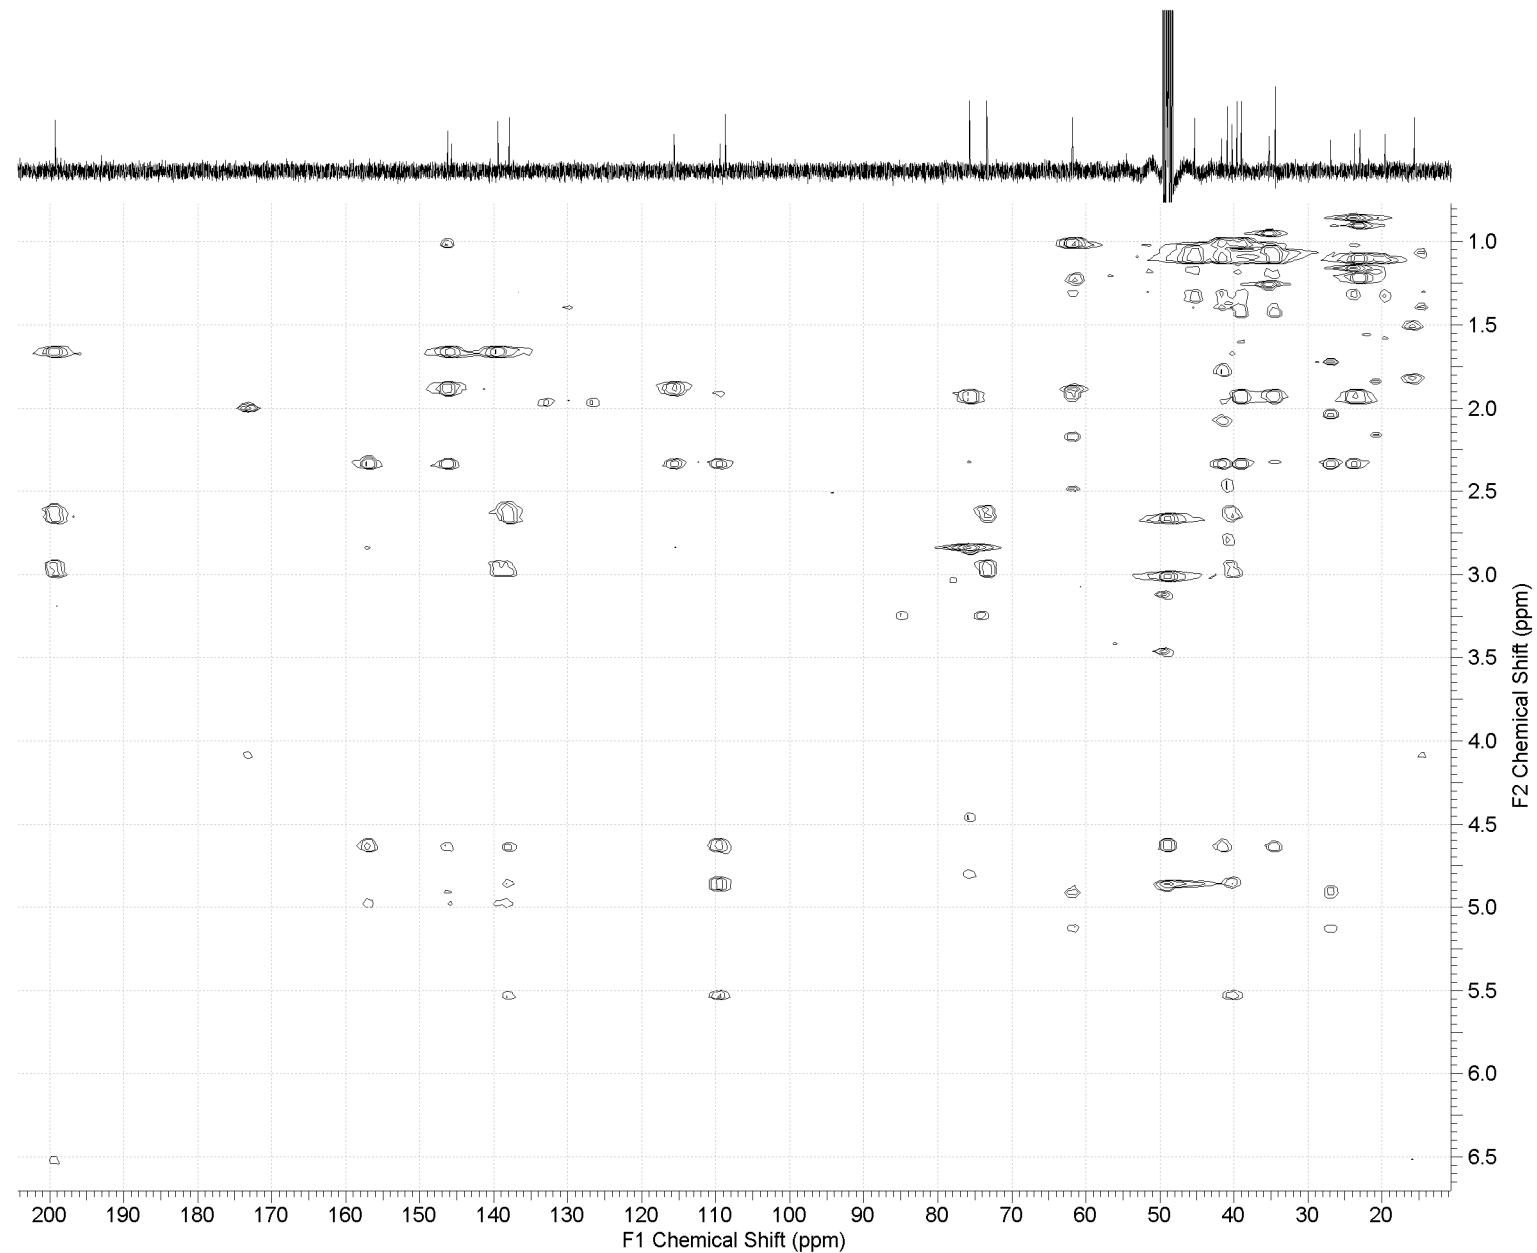

**Figure S24. HMBC NMR spectrum of cyclized phobasone A (3) in CD<sub>3</sub>OD.**

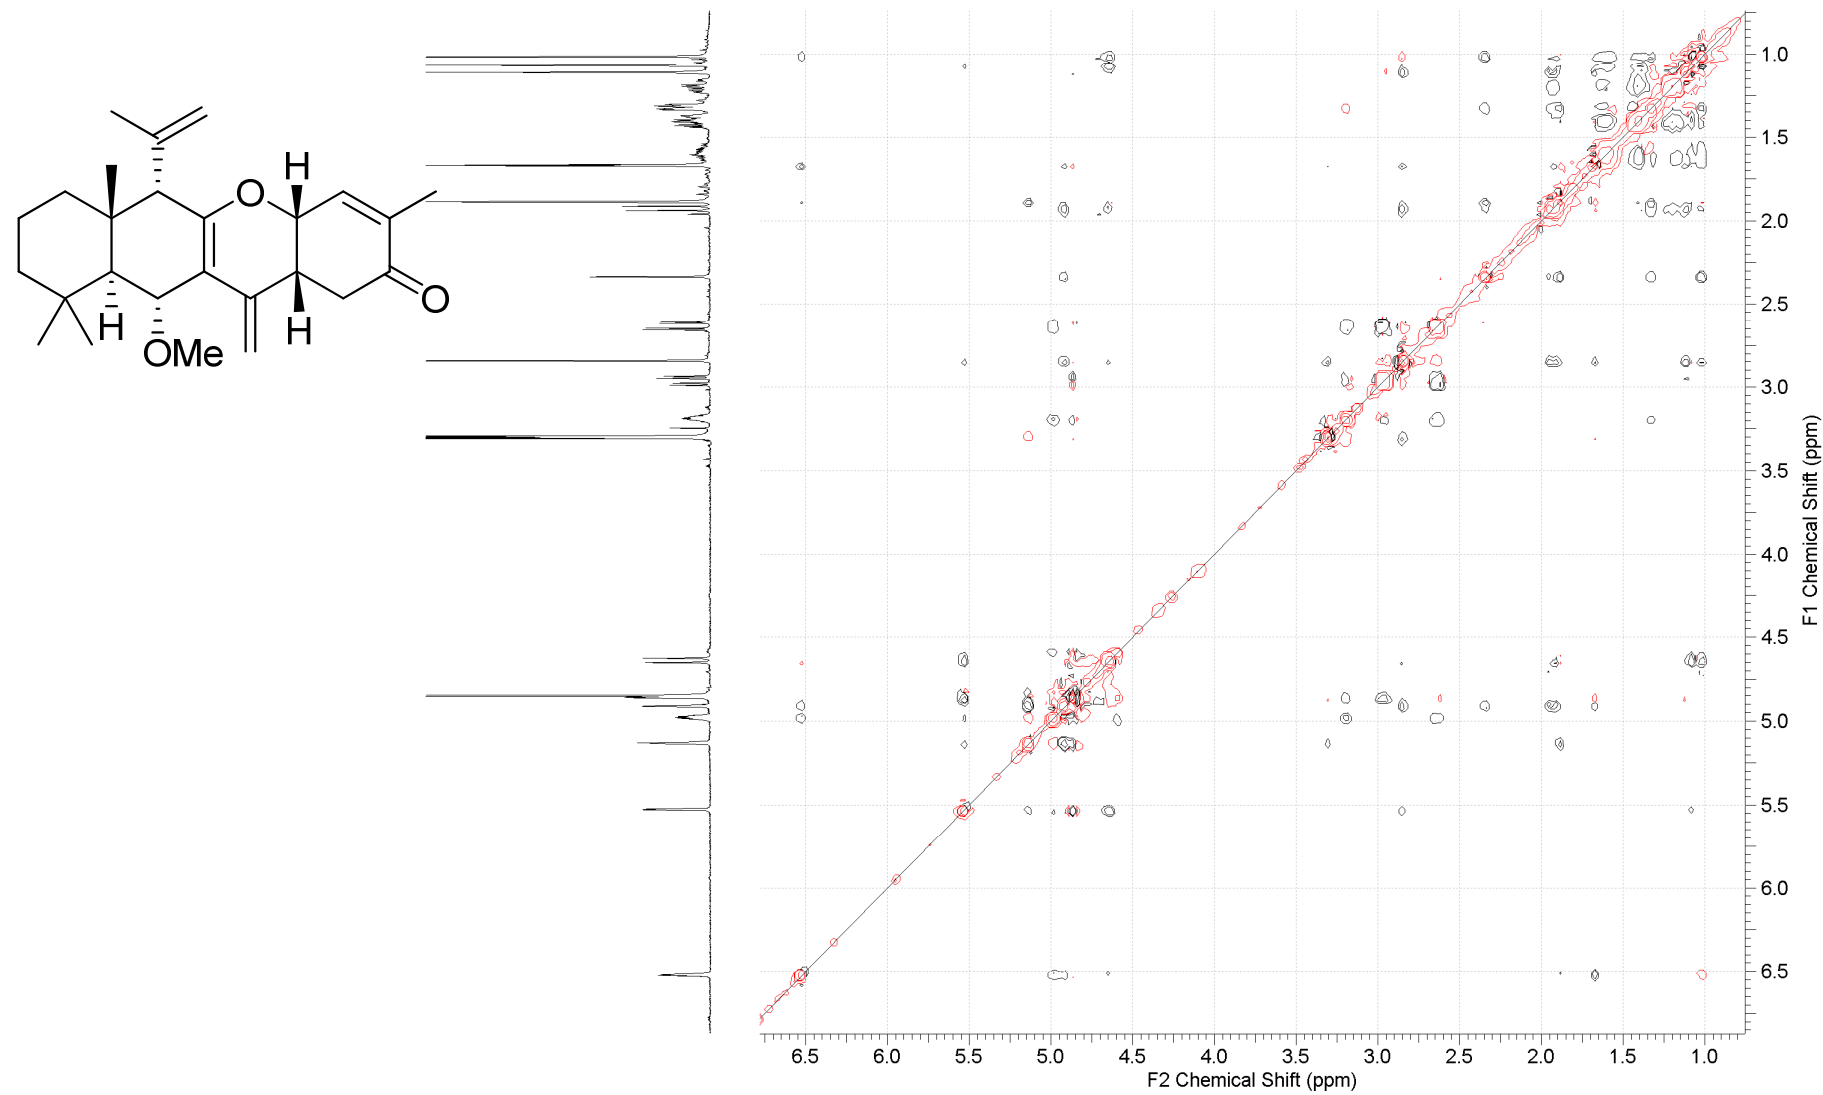

**Figure S25. NOESY NMR spectrum of cyclized phobasone A (3) in CD<sub>3</sub>OD.**

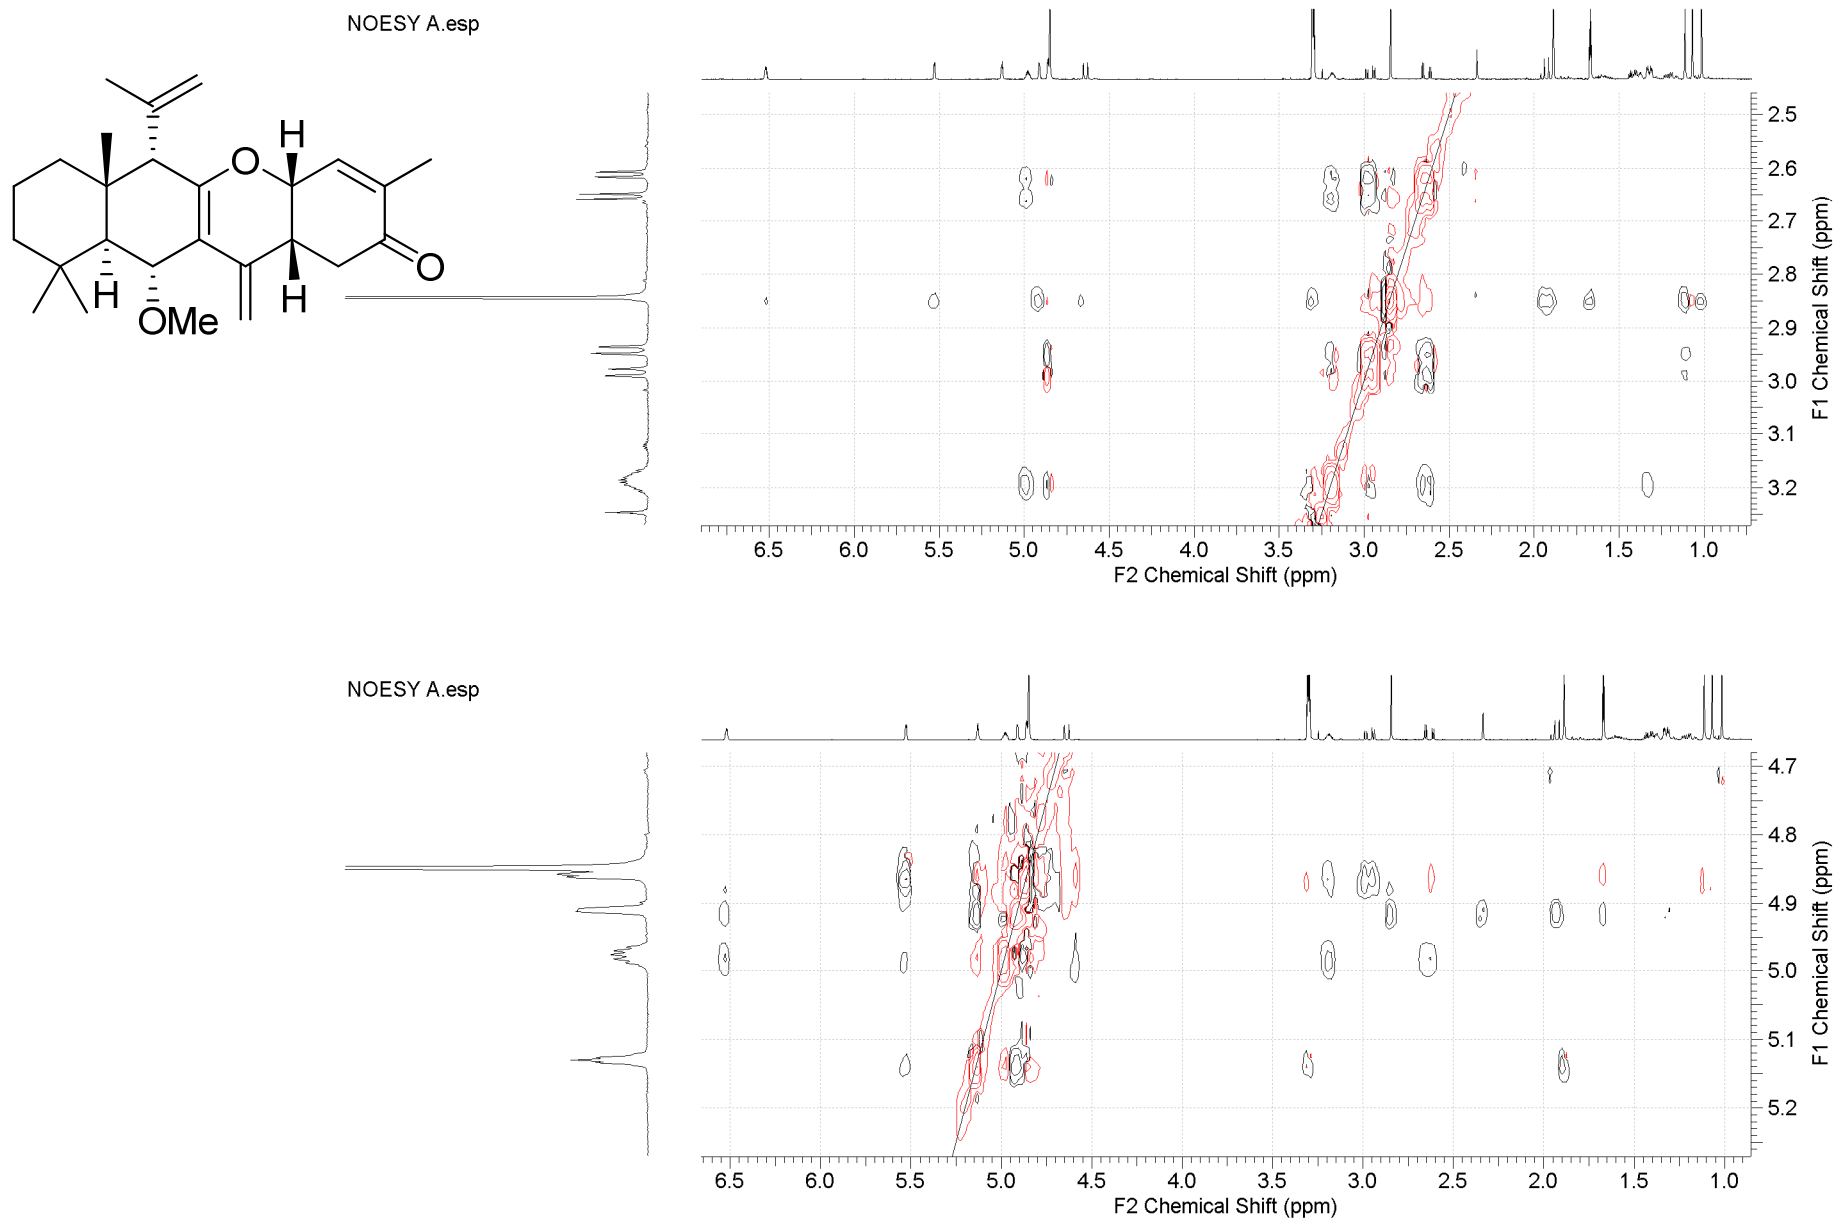

**Figure S26. Expanded NOESY NMR spectrum of cyclized phobasone A (3) in CD<sub>3</sub>OD.**
